# Supplementary material
Source: MDPI journal article supplement (https://www.mdpi.com/1424-8247/15/10/1264)

# Supplementary data

for

## Structure-Guide Design and Optimization of Potential Druglikeness Inhibitors for TGFβRI with the Pyrrolopyrimidine Scaffold

Dan Meng <sup>1, 2, 3</sup>, Jiali Xie <sup>1, 2, 3</sup>, Yihao Li <sup>1</sup>, Ruoyu Li <sup>1, 2, 3</sup>, Hui Zhou <sup>1, 2, 3, \*</sup> and Ping Deng <sup>1, 2, 3, \*</sup>

<sup>1</sup> College of Pharmacy, Chongqing Medical University, Chongqing, 400016, China.

<sup>2</sup> Chongqing Research Center for Pharmaceutical Engineering, Chongqing, 400016, China.

<sup>3</sup> Chongqing Key Research Laboratory for Quality Evaluation and Safety Research of APIs, Chongqing, 400016, China.

\* Correspondence: hzhou@cqmu.edu.cn; 100865@cqmu.edu.cn

**Table S1** The key amino acid residues interacting with ligands in the crystal structure

| PDB ID | Active data              | No.of H-bonds | Hydrogen Bonds                       | Hydrophobic                                                                                                                           | NO.of Hydrophobic interaction |
|--------|--------------------------|---------------|--------------------------------------|---------------------------------------------------------------------------------------------------------------------------------------|-------------------------------|
| 1PY5   | IC <sub>50</sub> =104 nM | 2             | <b>HIS283, ASP351</b>                | ILE211, VAL219, ALA230, VAL231, <b>LYS232</b> , LEU260, LEU278, LEU340, <b>SER280</b> , ASP281, TYR282, GLY286                        | 12                            |
| 1VJY   | IC <sub>50</sub> =4 nM   | 3             | <b>LYS232, HIS283, ASP351</b>        | ILE211, VAL219, ALA230, TYR249, LEU260, <b>SER280</b> , ASP281, TYR282, , GLY286<br>LEU340, LEU278                                    | 11                            |
| 1RW8   | IC <sub>50</sub> =175 nM | 1             | <b>HIS283</b>                        | ILE211, LYS213, VAL219, ALA230, <b>LYS232</b> , TYR249, LEU260, LEU278, <b>SER280</b> , ASP281, LYS337, ASN338, LEU340, <b>ASP351</b> | 14                            |
| 3FAA   | Ki=7.1 nM                | 3             | <b>HIS283, ASP351, LYS232</b>        | ILE211, ALA230, GLU245, TYR249, LEU260, LEU278, <b>SER280</b> , ASP281, TYR282, ASN338, LEU340                                        | 11                            |
| 3GXL   | IC <sub>50</sub> =25 nM  | 3             | <b>LYS32, HIS83</b> (double H-bonds) | ILE11, GLY14, VAL19, ALA30, GLU45, TYR49, LEU78, <b>SER80</b> , ASP81, TYR82, GLY86, LYS137, LEU140, <b>ASP151</b>                    | 14                            |
| 3HMM   | IC <sub>50</sub> =25 nM  | 2             | <b>LYS32, HIS83</b>                  | VAL19, ALA30, GLU45, TYR49, LEU60, LEU78, VAL79, TYR82, <b>SER80</b> , ASP81, LYS137, ASN138, LEU140, <b>ASP151</b>                   | 14                            |

|      |                           |   |                                |                                                                                                                                |    |
|------|---------------------------|---|--------------------------------|--------------------------------------------------------------------------------------------------------------------------------|----|
| 2WOU | IC <sub>50</sub> =72 nM   | 2 | HIS283, ASP290                 | ILE211, VAL219, ALA230, LYS232, LEU260, LEU278, SER280, ASP281, TYR282, GLY286, LEU340, ASP351                                 | 12 |
| 2WOT | IC <sub>50</sub> =44 nM   | 2 | HIS283, LYS232                 | ILE211, VAL219, ALA230, LEU260, LEU278, VAL279, SER280, ASP281, TYR282, GLU284, GLY286, ASN338, LEU340, ALA350, ASP351         | 15 |
| 3KCF | Ki=35 nM                  | 2 | LYS232, HIS283                 | ILE211, ALA230, GLU245, TYR249, LEU260, PHE262, LEU278, VAL279, SER280, ASP281, TYR282, LYS337, ASN338, LEU340, ASP351         | 15 |
| 2X7O | IC <sub>50</sub> =34 nM   | 2 | ASP281, HIS283                 | ILE211, GLY212, VAL219, ALA230, LYS232, GLU245, LEU260, LEU278, SER280, TYR282, GLU284, HIS285, GLY286, APS290, ARG294, LEU340 | 16 |
| 3TZM | NR                        | 2 | HIS283, LYS232                 | ILE211, GLY214, ARG215, ALA230, LEU260, LEU278, SER280, ASP281, TYR282, LYS335, LYS337, ASN338, LEU340, ASP351                 | 14 |
| 4X2J | NR                        | 4 | HIS283, TYR249, ASP351, GLU245 | ILE211, VAL219, ALA230, LYS232, LEU260, SER280, ASP281, TYR282, GLY286, LEU340                                                 | 10 |
| 4X2K | NR                        | 3 | HIS283, ASP281, ASP290         | ILE211, VAL219, ALA230, LYS232, LEU260, SER280, ASP281, TYR282, GLY286, LEU340                                                 | 10 |
| 4X2G | NR                        | 3 | ASP281, HIS283, ASP290         | ILE211, VAL219, ALA230, LEU260, SER280, TYR282, SER287, LEU340, TYR603                                                         | 9  |
| 4X0M | NR                        | 1 | ASP281                         | ILE211, VAL219, ALA230, LEU260, TYR282, HIS283, LEU340                                                                         | 7  |
| 4X2F | NR                        | 3 | HIS283, ASP281, ASP290         | ILE211, ALA230, LEU260, TYR282, SER287, LEU340                                                                                 | 6  |
| 5E8W | NR                        | 3 | ASP281, LYS337, HIS283         | ILE211, GLY212, LYS213, GLY214, VAL219, ALA230, LYS232, LEU260, SER280, TYR282, GLY286, LEU340, ASP351                         | 13 |
| 5E8Z | NR                        | 3 | LYS232, ASP281, HIS283         | ILE211, LYS213, GLY214, ALA230, LEU260, TYR282, GLU284, GLY286, SER287, ASP290, LYS337, LEU340, ASP351                         | 13 |
| 5FRI | IC <sub>50</sub> = 1.9 nM | 2 | HIS283(double H-bonds)         | ILE211, VAL219, ALA230, LYS232, LEU260, SER280, ASP281, TYR282, GLU284, GKY286, LEU340, ALA350, ASP351                         | 13 |
| 5USQ | NR                        | 2 | HIS283, ASP290                 | ILE211, ALA230, LYS232, LEU278, VAL279, SER280, ASP281, TYR282, GLY286, SER287, LEU340, ASP351                                 | 12 |
| 6B8Y | IC <sub>50</sub> =0.55 nM | 3 | HIS283, ASP351, LYS232         | VAL219, ALA230, LEU260, LEU278, VAL279, SER280, ASP281, TYR282, LYS337, ASN338, LEU340,                                        | 11 |
| 5QIK | IC <sub>50</sub> =24 nM   | 3 | LYS232, ASP351, HIS283         | ILE211, LYS213, GLY214, ALA230, LEU260, SER280, ASP281, TYR282, GLU284, GLY286, LYS337, LEU340                                 | 12 |

|      |                          |   |                |                                                                                                          |    |
|------|--------------------------|---|----------------|----------------------------------------------------------------------------------------------------------|----|
| 5QIL | IC <sub>50</sub> =3 nM   | 2 | HIS283, LYS232 | ILE211,LYS213,GLY214,AL219,ALA230,TYR249,LEU260,LEU278,SER280,ASP281,GLY286,LEU340,ASP351                | 13 |
| 5QIM | IC <sub>50</sub> =6 nM   | 2 | HIS283, LYS232 | ILE211,GLY214,VAL219,ALA232,GLU245,LEU260,PHE262,LEU278,VAL279,SER280,ASP281,TYR282,GLU284,GLY286,LEU340 | 15 |
| 5QU0 | IC <sub>50</sub> =1.6 nM | 2 | LYS232, HIS283 | ILE211,VAL219,ALA230,LEU278,SER280,ASP281,TYR282,LEU340,ASP351                                           | 9  |
| 5QTZ | IC <sub>50</sub> =10 nM  | 2 | HIS283, LYS232 | ILE211,VAL219,ALA230,TYR249,LEU260,LEU278,SER280,ASP281,TYR282,LYS337,LEU340,ASP351                      | 12 |

**Table S2.** The results of AUCs of scoring functions.

| Score Property             | Area under ROC Curve | ROC Evaluation | The ROC were calculated by DS 2020 program. |
|----------------------------|----------------------|----------------|---------------------------------------------|
| CDOCKER_ENERGY             | 0.539                | Fall           |                                             |
| CDOCKER_INTERACTION_ENERGY | 0.751                | Fair           |                                             |
| PLP1                       | 0.832                | Good           |                                             |
| PLP2                       | 0.828                | Good           |                                             |
| PMF                        | 0.921                | Excellent      |                                             |
| PMF04                      | 0.864                | Good           |                                             |
| Jain                       | 0.761                | Fair           |                                             |
| LigScore1_Dreiding         | 0.745                | Fair           |                                             |
| LigScore2_Dreiding         | 0.821                | Good           |                                             |
| Ludi_1                     | 0.871                | Good           |                                             |
| Ludi_2                     | 0.859                | Good           |                                             |
| Ludi_3                     | 0.878                | Good           |                                             |

**Table S3-1.** The information of the designed molecules is supported by docking to the receptor. (PDB ID:6B8Y).

| Compound ID | PMF    | Affinity (kcal/mol) | K <sub>i</sub> (nm) | H-Bond                                      | Hydrophobic interaction                                  |
|-------------|--------|---------------------|---------------------|---------------------------------------------|----------------------------------------------------------|
| H1          | 127.36 | -11.34              | 4.87                | TYR249,HIS283,ASP351                        | ILE211,VAL219,ALA230,LEU278,TYR282,LEU340, ALA350        |
| H2          | 124.63 | -11.01              | 8.50                | TYR249,HIS283,ASP351                        | ILE211,VAL219,ALA230,LYS232,LEU278,TYR282,LEU340,ALA350  |
| H3          | 123.1  | -9.27               | 160.34              | LYS232,TYR249,HIS283,ASP351                 | ILE211,VAL219,ALA230,LEU278,LEU340,ALA350                |
| H4          | 120.37 | -9.47               | 110.61              | LYS232,TYR249,HIS283,ASP351                 | ILE211,VAL219,ALA230,LEU260,LEU278,LEU340, ALA350        |
| H5          | 119.48 | -9.84               | 61.27               | LYS232,HIS283                               | ILE211,VAL219,ALA230,TYR249,LEU260,LEU278, LEU340,ALA350 |
| H6          | 118.83 | -9.43               | 122.4               | TYR249,HIS283,LYS232                        | ILE211,VAL219,ALA230,LEU278,LEU340,ALA350                |
| H7          | 115.74 | -9.37               | 135.44              | LYS232,TYR249,HIS283,ASP351                 | ILE211,VAL219,ALA230,LEU260,LEU278,TYR282,LEU340,ALA350  |
| H8          | 114.31 | -9.5                | 108.76              | LYS232,HIS283,ASP281,ASP351                 | ILE211,VAL219,ALA230,TYR249,LEU260,LEU278, LEU340,ALA350 |
| H9          | 113.87 | -9.87               | 61.27               | LYS232, TYR249,HIS283,                      | ILE211,VAL219,ALA230,LEU278,LEU340,ALA350                |
| H10         | 113.39 | -9.39               | 130.95              | LYS232, TYR249,HIS283, GLU284, ASP351       | ILE211,VAL219,ALA230,LEU260,LEU278,LEU340, ALA350        |
| H11         | 112.63 | -8.92               | 289.47              | LYS232,HIS283,ASP351                        | ILE211,VAL219,ALA230,TYR249,LEU260,LEU278,LEU340, ALA350 |
| S1          | 125.89 | -9.81               | 64.45               | LYS232,SER280,HIS283,ASN338                 | ILE211,VAL219,ALA230,LEU260,LEU278,LEU340, ALA350        |
| S2          | 124.07 | -8.63               | 472.25              | ALA230,LYS232,SER280,HIS283,ASP351,ASN338   | VAL219,LEU260,LEU340,ALA350                              |
| S3          | 123.01 | -9.87               | 58.24               | LYS232,SER280,HIS283,ASP351                 | ILE211,VAL219,ALA230,LEU260,LEU278,LEU340, ALA350        |
| S4          | 122.36 | -8.46               | 608.31              | SER280,HIS283                               | ILE211,VAL219,ALA230,LEU260,LEU278,LEU340, ALA350        |
| S5          | 121.53 | -9.75               | 71.32               | LYS232, TYR249,HIS283,ASP351                | ILE211,VAL219,ALA230,LEU340,ALA350                       |
| S6          | 121.22 | -9.68               | 80.26               | LYS232,SER280,HIS283,ASP351                 | ILE211,VAL219,ALA230,LEU260,LEU278,LEU340, ALA350        |
| S7          | 121.21 | -8.28               | 856.56              | ALA230,LYS232, TYR249, LEU278,HIS283,ASP351 | ILE211,VAL219,LEU260,LEU340,ALA350                       |
| S8          | 120.98 | -8.31               | 810.47              | LYS232,HIS283,ASP351                        | ILE211,VAL219,ALA230,LEU260,LEU278,LEU340, ALA350        |
| S9          | 120.8  | -8.65               | 456.58              | LYS232, TYR249,HIS283,ASP351                | ILE211,VAL219,ALA230,LEU260,LEU278,LEU340, ALA350        |
| S10         | 119.36 | -8.91               | 293.4               | LYS232,LEU278,HIS283,ASP351                 | ILE211,VAL219,ALA230,LEU260,LEU340,ALA350                |
| S11         | 112.25 | -8.72               | 405.70              | LYS232, HIS283,ASP351                       | ILE211,VAL219,ALA230,LEU260,LEU278,LEU340, ALA350        |
| W1          | 123.06 | -7.63               | 2.55                | LYS232, TYR249,HIS283,ASP351,ASN338         | ILE211,VAL219,ALA230,LEU260,LEU278,ALA350, LEU340        |
| W2          | 116.8  | -8.87               | 314.96              | LYS232, TYR249,HIS283,ASP351,ASN338         | ILE211,VAL219,ALA230,LEU260,LEU340                       |
| W3          | 116.42 | -8.7                | 419.62              | LYS232, TYR249,HIS283,ASP351                | ILE211,VAL219,ALA230,LEU260,LEU340                       |
| W4          | 115.12 | -8.68               | 434.03              | LYS232, TYR 249,HIS283,LYS337,ASP351        | ILE211,VAL219,ALA230,LEU260,LEU340                       |
| W5          | 114.08 | -8.71               | 412.61              | LYS232, TYR249,HIS283,ASP351                | ILE211,VAL219,ALA230,LEU260,LEU340                       |
| W6          | 113.36 | -8.13               | 1.1                 | LYS232, TYR249,HIS283,ASP351,ASN338         | ILE211,VAL219,ALA230,LEU260,LEU278,LEU340, ALA350        |
| W7          | 112.99 | -8.65               | 456.58              | LYS232, TYR249,HIS283,ALYS337,ASN338        | ILE211,VAL219,ALA230,LEU260,LEU340,ALA350                |
| W8          | 112.94 | -7.73               | 2.16                | LYS232, TYR249,HIS283,ASP351,ASN338         | ILE211,VAL219,ALA230,LEU278,LEU340,ALA350                |
| S1W8        | 124.65 | -8.74               | 392.23              | HIS283,LYS337,ASN338,APS351                 | ILE211,VAL219,ALA230,LEU260,LEU340,ALA350                |
| BMS22       | 113.32 | -9.25               | 165.85              | LYS232, TYR249,HIS283,ASP351                | ILE211,VAL219,ALA230,LEU278,LEU340,ALA350                |

**Table S3-2.** The chemical structures of 30 modified molecules

|                                                                                                  |                                                                                                  |                                                                                                    |                                                                                                  |                                                                                                   |                                                                                                   |
|--------------------------------------------------------------------------------------------------|--------------------------------------------------------------------------------------------------|----------------------------------------------------------------------------------------------------|--------------------------------------------------------------------------------------------------|---------------------------------------------------------------------------------------------------|---------------------------------------------------------------------------------------------------|
| 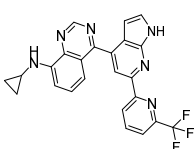<br><b>H1</b>   | <br><b>H2</b>   | <br><b>H3</b>     | <br><b>H4</b>  | <br><b>H5</b>  | <br><b>H6</b>  |
| <br><b>H7</b>   | <br><b>H8</b>   | <br><b>H9</b>     | <br><b>H10</b> | <br><b>H11</b> |                                                                                                   |
| <br><b>S1</b>   | <br><b>S2</b>   | <br><b>S3</b>     | <br><b>S4</b>  | <br><b>S5</b>  | <br><b>S6</b>  |
| <br><b>S7</b>   | <br><b>S8</b>   | <br><b>S9</b>     | <br><b>S10</b> | <br><b>S11</b> |                                                                                                   |
| <br><b>W1</b>  | <br><b>W2</b>  | <br><b>W3</b>    | <br><b>W4</b> | <br><b>W5</b> | <br><b>W6</b> |
| <br><b>W7</b> | <br><b>W8</b> | <br><b>S1W8</b> |                                                                                                  |                                                                                                   |                                                                                                   |

**Figure S1.** The chemical structures of modified molecules from hinge region (in red), Solvent channel region (in blue), and Selective pocket region (in yellow).

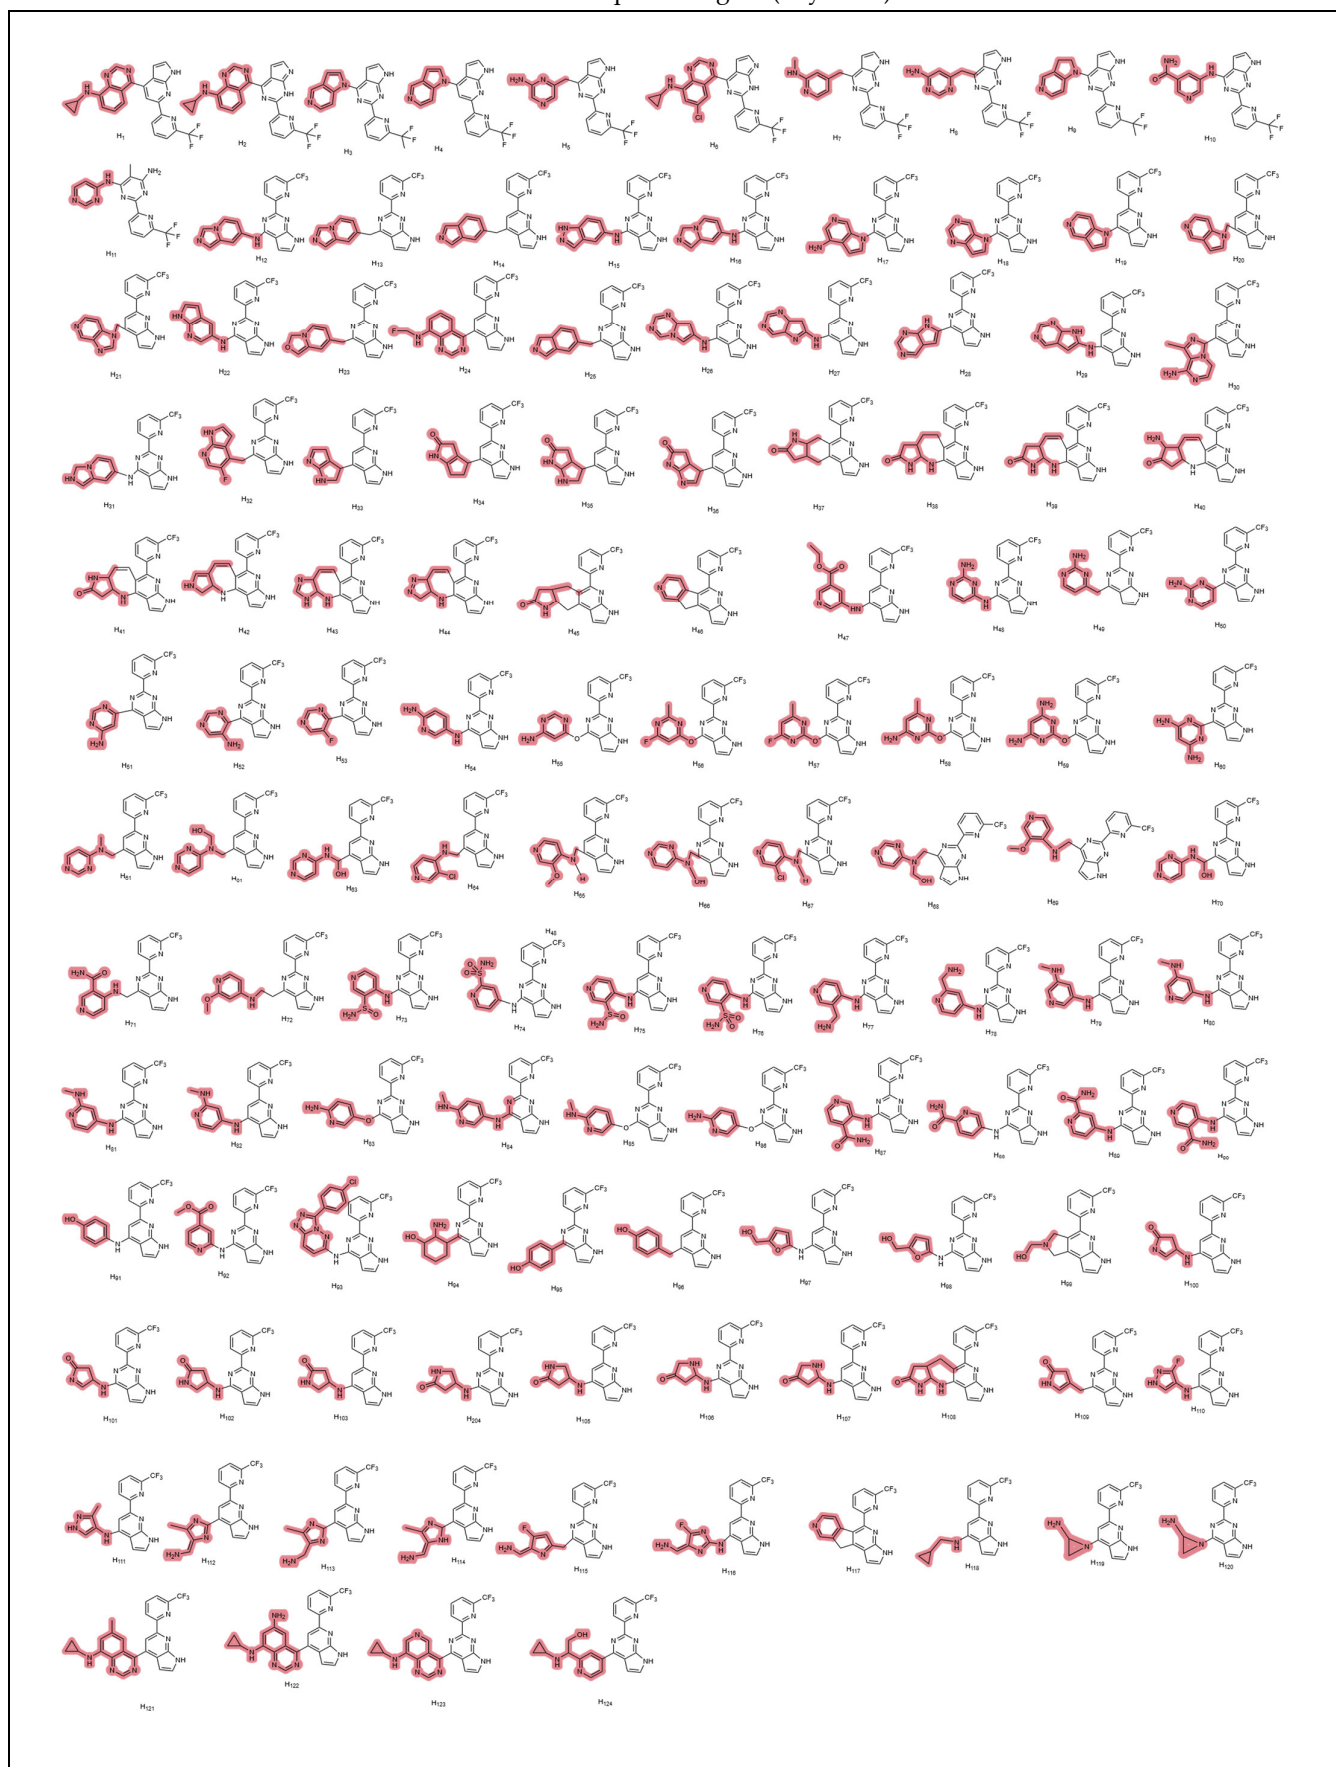

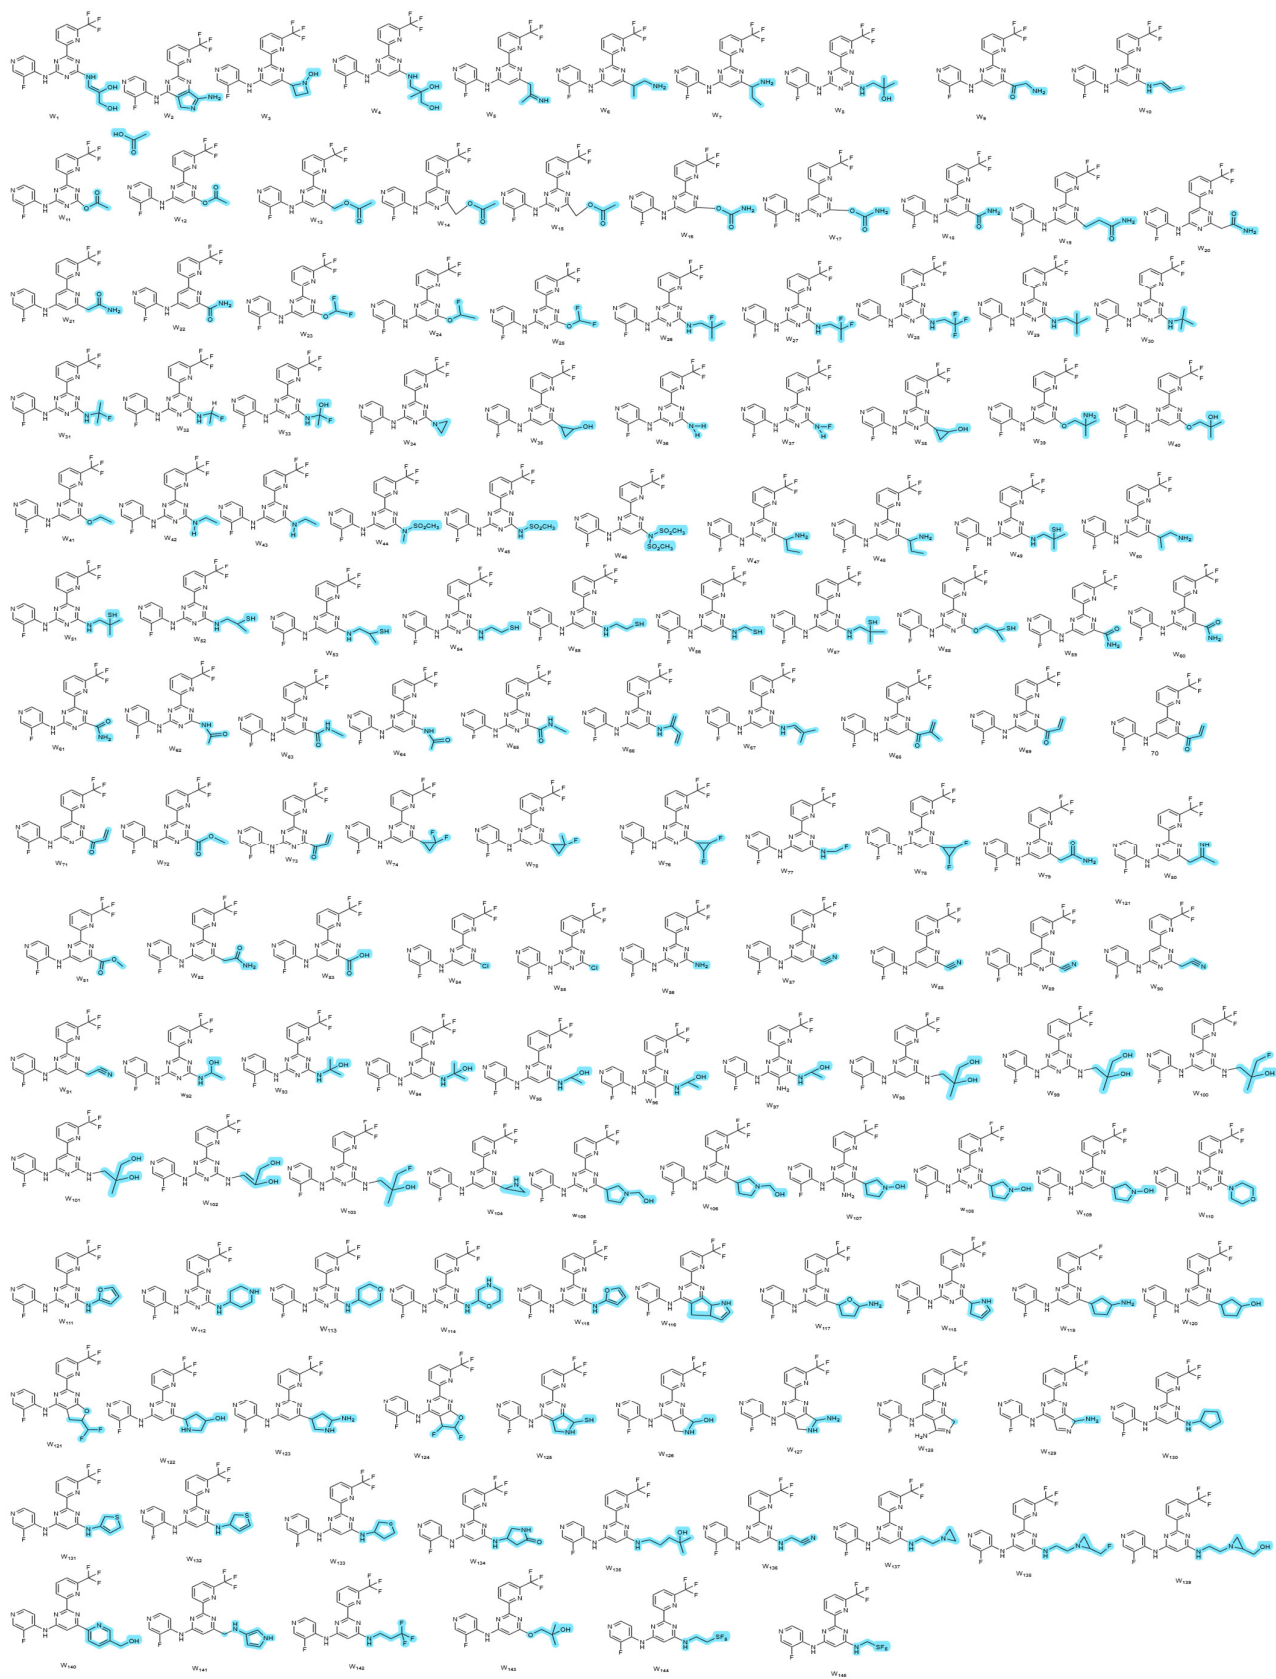



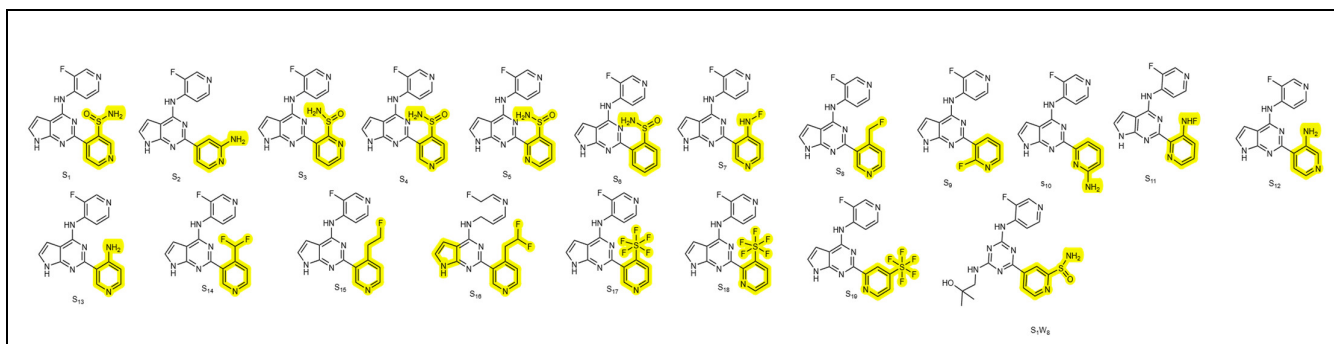

**Figure S2.3D** interaction pattern diagram between the protein and modified molecules in the crystal structure of 6B8Y.

*Hinge region modified*

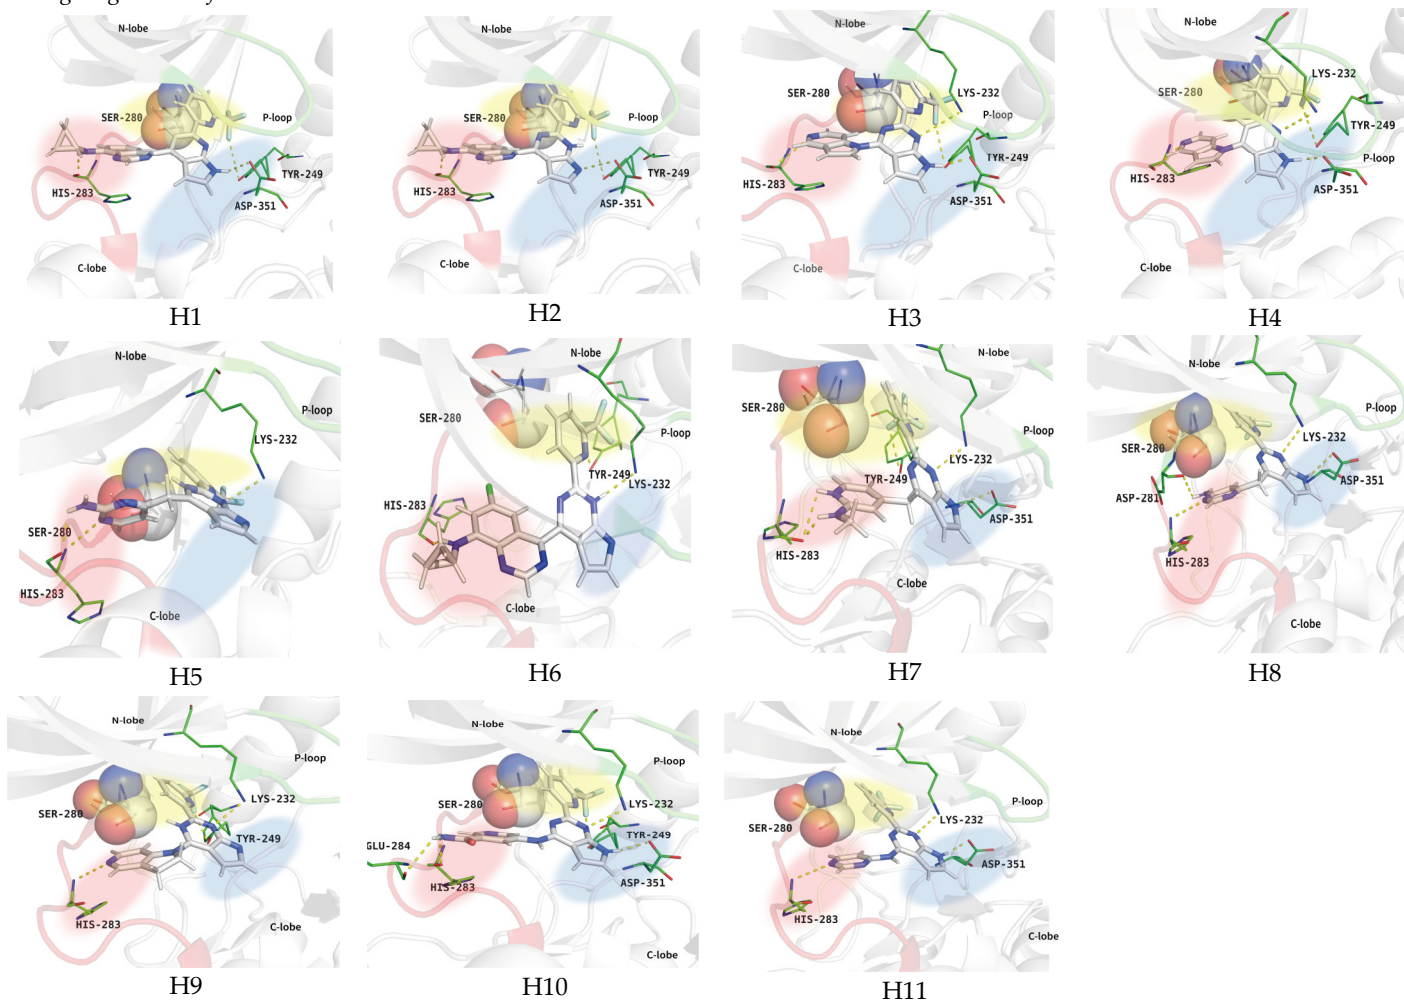

*Selective pocket region modified:*

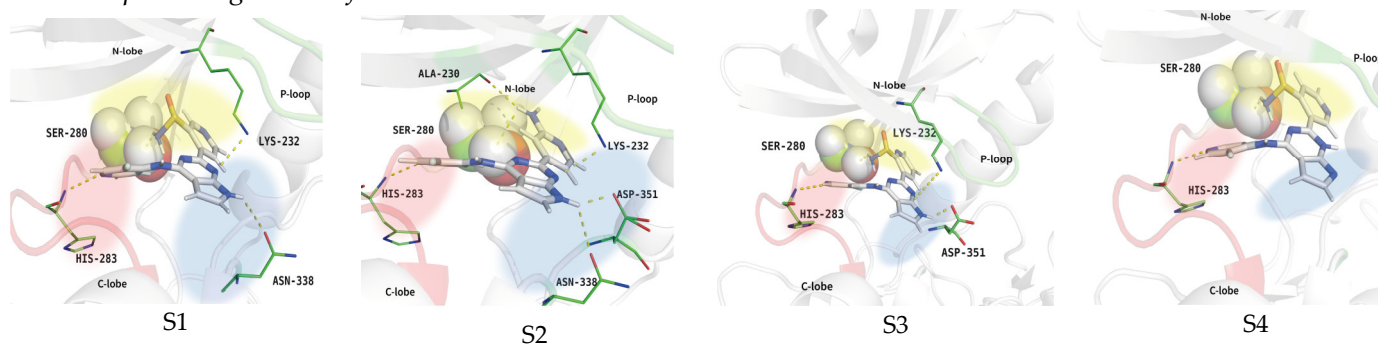



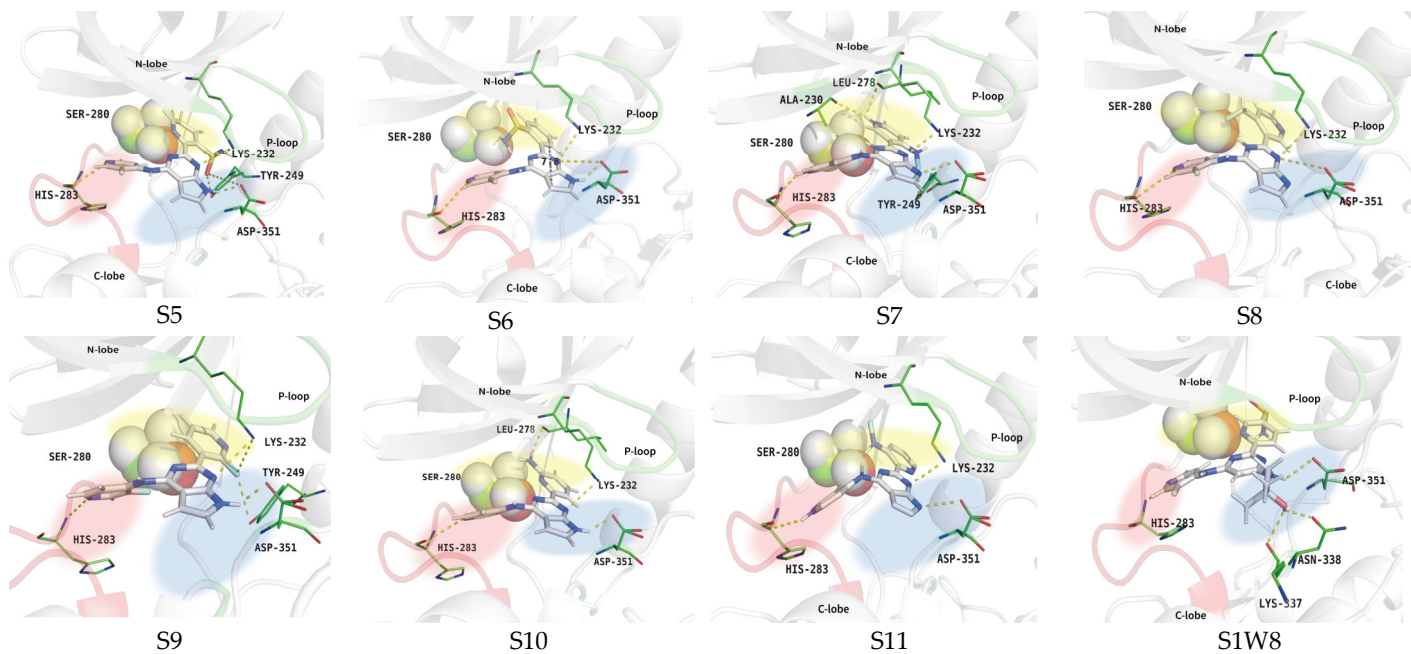

*Solvent channel region modified:*

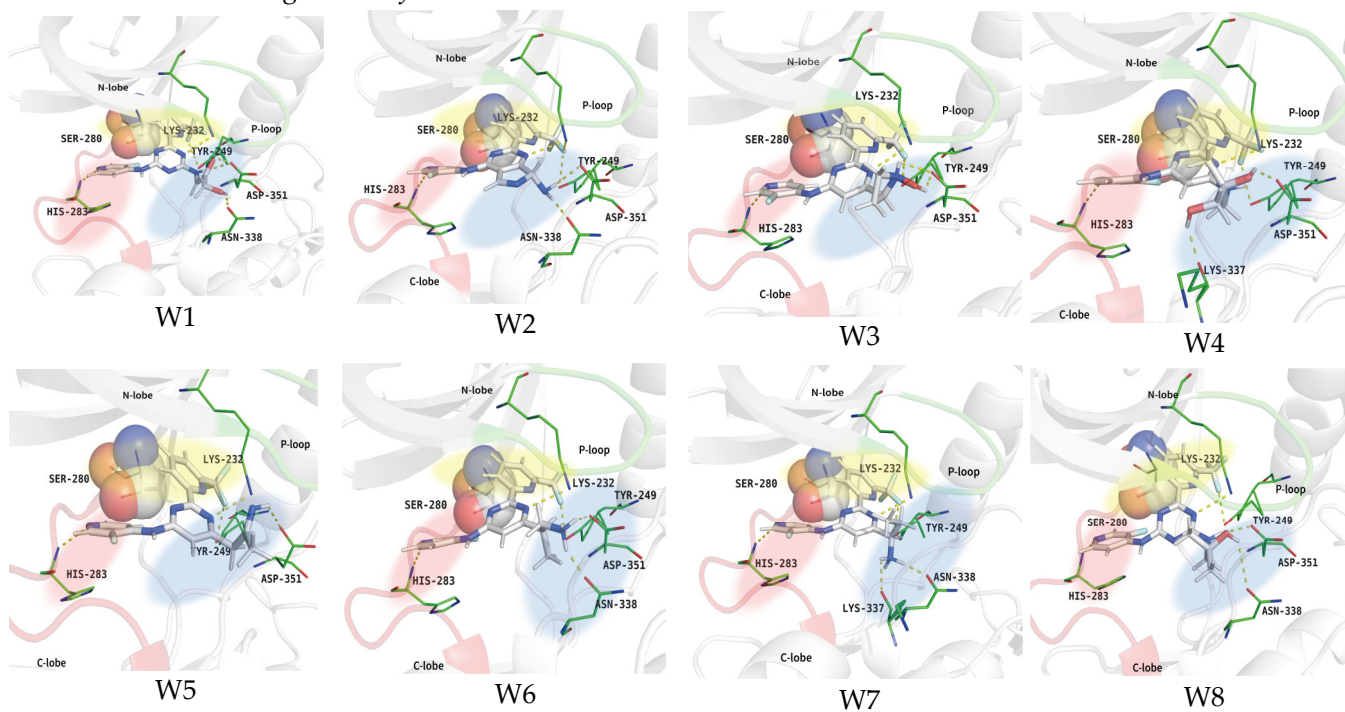

**Figure S3.** Number of hydrogen bonds of five designed molecules and reference ligand BMS22 combined with TGF $\beta$ RI during 100 ns MD simulations.

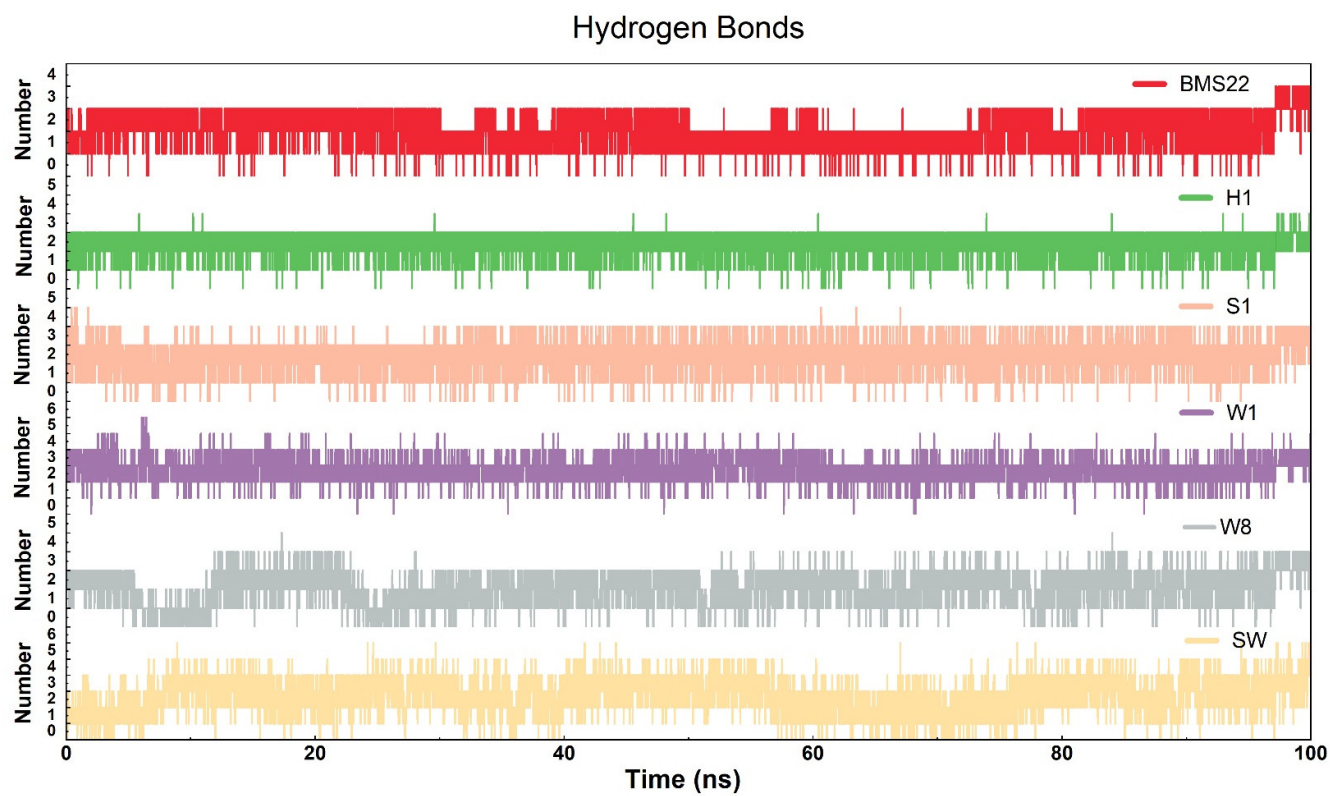

**Table S4.** Occupancy rates of hydrogen bonds between TGFβRI and each potential inhibitor.

|       | acceptor                 | donor H                  | donor                    | frac % <sup>e</sup> |
|-------|--------------------------|--------------------------|--------------------------|---------------------|
| BMS22 | LIG@N15                  | HIS_283@H                | HIS_283@N <sup>a</sup>   | 88.38%              |
|       | ASP_351@OD1b             | LIG@H30                  | LIG@N9                   | 58.87%              |
|       | LIG@N3                   | LYS@HZ2                  | LYS_232@NZ               | 32.03%              |
|       | ASP_351@OD2b             | LIG@H30                  | LIG@N9                   | 22.88%              |
|       | LIG@N23                  | LYS_232@HZ2              | LYS_232@NZ               | 2.81%               |
| H1    | LIG@N1                   | LYS_232@HZ1              | LYS_232@NZ               | 75.70%              |
|       | ASP_351@OD1 <sup>b</sup> | LIG@H16                  | LIG@N5                   | 61.22%              |
|       | HIS_283@O <sup>a</sup>   | LIG@H15                  | LIG@N4                   | 59.55%              |
|       | ASP_351@OD2 <sup>b</sup> | LIG@H16                  | LIG@N5                   | 33.40%              |
|       | LIG@N                    | LYS_232@HZ1              | LYS_232@NZ               | 1.64%               |
| S1    | LIG@N5                   | HIS_283@H <sup>a</sup>   | HIS_283@N <sup>a</sup>   | 81.43%              |
|       | ASP_351@OD2 <sup>b</sup> | LIG@H7                   | LIG@N3                   | 78.18%              |
|       | SER_280@OG <sup>c</sup>  | LIG@H10                  | LIG@N6                   | 53.47%              |
|       | ASP_281@O <sup>a</sup>   | LIG@H11                  | LIG@N6                   | 18.90%              |
|       | ALA_230@O                | LIG@H11                  | LIG@N6                   | 3.36%               |
| W1    | ASP_351@OD1 <sup>b</sup> | LIG@H42                  | LIG@O28                  | 94.67%              |
|       | ASP_351@OD1 <sup>b</sup> | LIG@H41                  | LIG@N25                  | 88.79%              |
|       | LIG@N21                  | HIS_283@H <sup>a</sup>   | HIS_283@N <sup>a</sup>   | 80.00%              |
|       | LYS_213@O <sup>d</sup>   | LIG@H43                  | LIG@O30                  | 7.57%               |
|       | LIG@O28                  | ASN_338@HD21             | ASN_338@ND2 <sup>b</sup> | 3.44%               |
| W8    | LIG@N7                   | HIS_283@H <sup>a</sup>   | HIS_283@N <sup>a</sup>   | 83.97%              |
|       | ASP_351@OD2 <sup>b</sup> | LIG@H16                  | LIG@O                    | 49.02%              |
|       | ASP_351@OD2 <sup>b</sup> | LIG@H14                  | LIG@N5                   | 26.66%              |
|       | ASP_351@OD1 <sup>b</sup> | LIG@H16                  | LIG@O                    | 22.27%              |
|       | ASP_351@OD1 <sup>b</sup> | LIG@H14                  | LIG@N5                   | 20.47%              |
|       | LIG@O                    | ASN_338@HD22             | ASN_338@ND2 <sup>b</sup> | 4.35%               |
| S1W8  | LIG@N4                   | HIS_283@H <sup>a</sup>   | HIS_283@N <sup>a</sup>   | 85.11%              |
|       | LIG@O1                   | SER_280@HG1 <sup>a</sup> | SER_280@OG <sup>c</sup>  | 51.60%              |
|       | ASP_351@OD1 <sup>b</sup> | LIG@H17                  | LIG@O                    | 38.91%              |
|       | ASP_351@OD1 <sup>b</sup> | LIG@H16                  | LIG@N5                   | 36.68%              |
|       | ASP_351@OD2 <sup>b</sup> | LIG@H16                  | LIG@N5                   | 18.98%              |
|       | ASP_351@OD2 <sup>b</sup> | LIG@H17                  | LIG@O                    | 12.61%              |
|       | SER280@OG <sup>c</sup>   | LIG@H18                  | LIG@N6                   | 10.07%              |
|       | LYS_213@O <sup>d</sup>   | LIG@H17                  | LIG@O                    | 9.40%               |
|       | LIG@N5                   | ASN_338@HD22             | ASN_338@ND2 <sup>b</sup> | 3.39%               |

a. Hydrogen bond interaction with the hinge region;

b. Hydrogen bond interaction with the solvent channel;

c. Hydrogen bond interaction with the selective hydrophobic pocket;

d. Hydrogen bond interaction with the P-loop region;

e. The hydrogen bonds are determined by the default criteria (acceptor... H-donor angle of &gt;120° and acceptor ... donor distance of &lt;3.5 Å) in the bonds.tcl of the VMD program

## NMR spectra of synthesized compounds

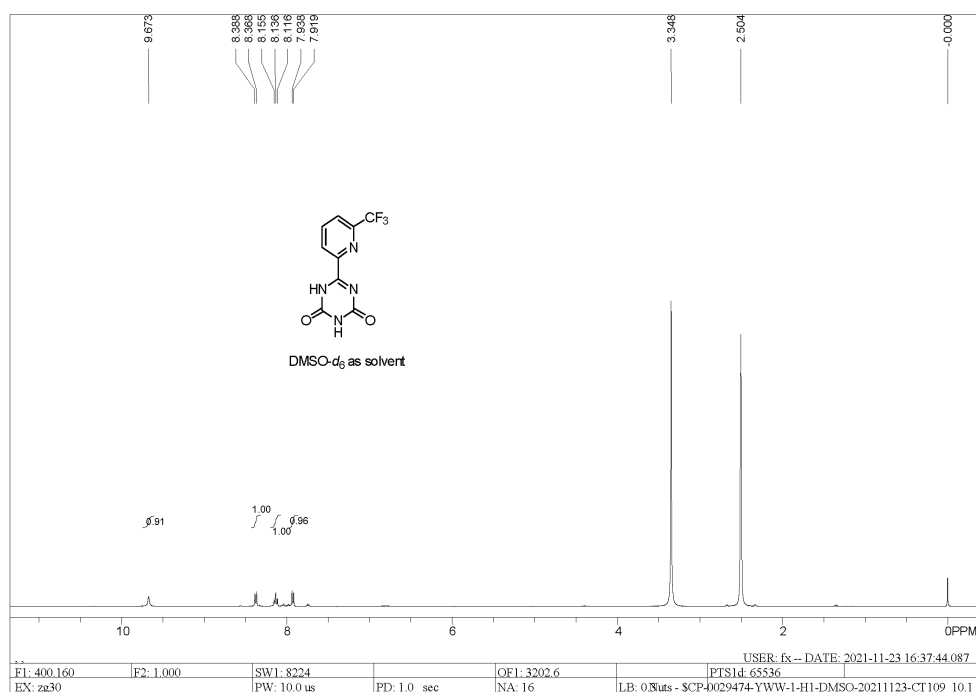

**Figure S4**  $^1\text{H}$ -NMR spectrum of 6-(6-(trifluoromethyl)pyridin-2-yl)-1,3,5-triazine-2,4(1H,3H)-dione.

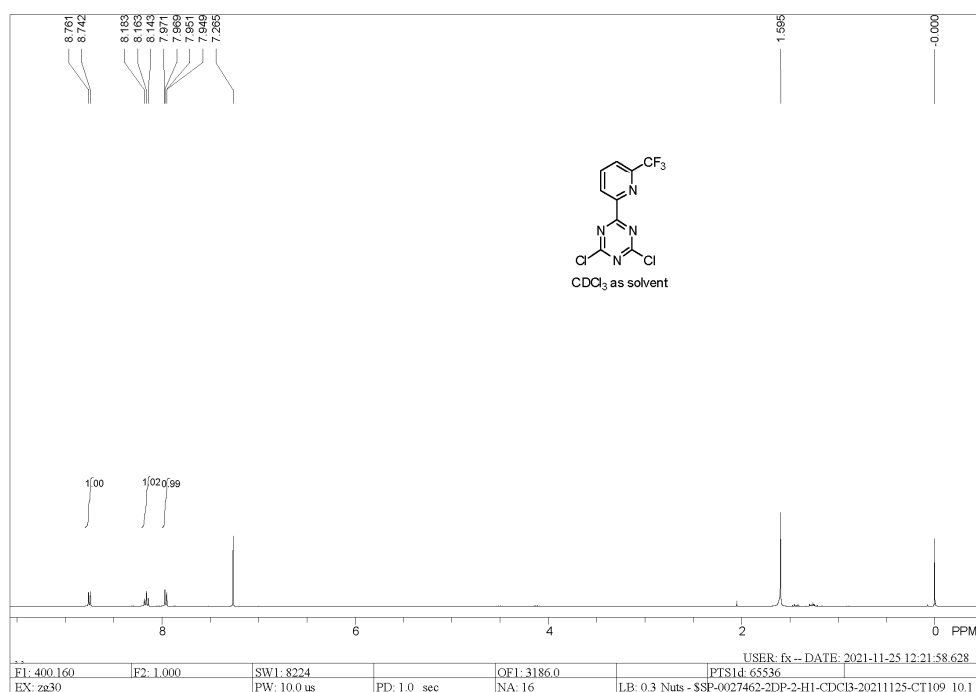

**Figure S5**  $^1\text{H}$ -NMR spectrum of 2,4-dichloro-6-(6-(trifluoromethyl)pyridin-2-yl)-1,3,5-triazine.

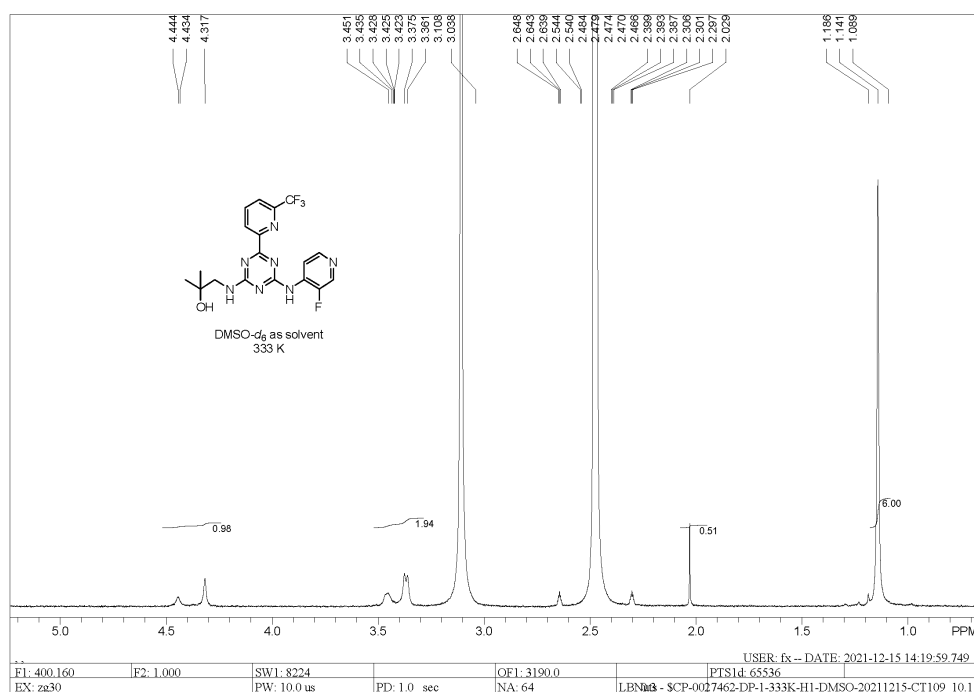

**Figure S6**  $^1\text{H}$ -NMR spectrum of 1-((4-((3-fluoropyridin-4-yl)amino)-6-(6-(trifluoromethyl)pyridin-2-yl)-1,3,5-triazin-2-yl)amino)-2-methylpropan-2-ol.



## MS report 1: 6-(6-(trifluoromethyl)pyridin-2-yl)-1,3,5-triazine-2,4(1H,3H)-dione

File ..T109\MONITOR\SP-0027462-1P1-01831-LCMS047.D Tgt Mass (EZ): 258.00  
Injection Date : 23 Nov 21 5:32 pm +0800 Seq. Line : 0  
Sample Name : SP-0027462-1P1 Location : P1-F-04  
Acq. Operator : 109monitor Inj : 1  
Spec. Reported : MS Integration Inj Volume : 0.5 ul  
Acq. Method : C:\Chem32\1\METHODS\MONITOR 3MIN-50-B-P  
Analysis Method : C:\Chem32\1\METHODS\MONITOR 3MIN-50-B-P.M  
Sample Info : Easy-Access Method: 'MONITOR 3MIN-50-B-P.M' 258.00  
Method Info : Column: Waters X Bridge C18: 50mm\*4.6 mm\*3.5 um;  
Mobile Phase: A: Water (0.01mol/L NH4HCO3) B: ACN  
Gradient : B from 5% to 95% for 1.6 min and hold 95% for 1.4 min;  
Flow rate: 2.0 ml/min;  
Column Temperature: 40 °C

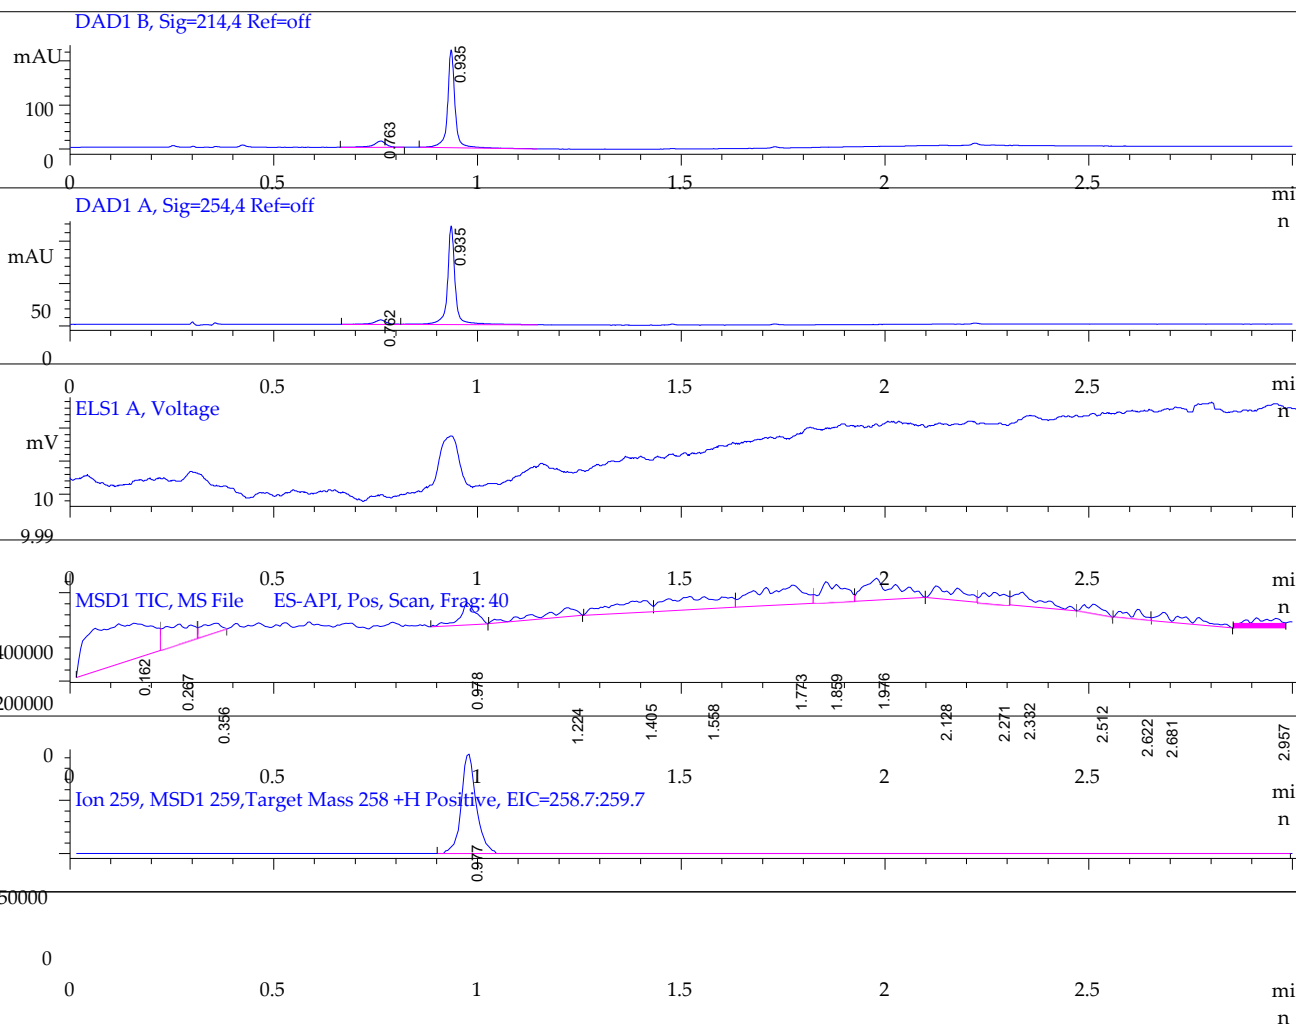

## Integration Results for DAD1 B, Sig=214,4 Ref=off

| RetTim | Width | Area   | Height | Area% |
|--------|-------|--------|--------|-------|
| 0.76   | 0.03  | 29.00  | 13.86  | 9.45  |
| 0.94   | 0.02  | 277.97 | 221.62 | 90.55 |

## Integration Results for DAD1 A, Sig=254,4 Ref=off

| RetTim | Width | Area   | Height | Area% |
|--------|-------|--------|--------|-------|
| 0.76   | 0.03  | 10.66  | 5.16   | 6.57  |
| 0.94   | 0.02  | 151.71 | 116.16 | 93.43 |

## Integration Results for ELS1 A, Voltage

| RetTim | Width | Area   | Height | Area% |
|--------|-------|--------|--------|-------|
| 0.99   | 0.02  | 10.66  | 5.16   | 6.57  |
| 1.01   | 0.02  | 151.71 | 116.16 | 93.43 |

## Integration Results for MSD1 TIC, MS File

| RetTime | Width | Area | Height | Area% |
|---------|-------|------|--------|-------|
|---------|-------|------|--------|-------|

LCMS047 11/23/2021 5:36:21 PM 109monitor

Page 1 of 7

| ----- | ----- | -----      | -----     |       |  |
|-------|-------|------------|-----------|-------|--|
| 0.16  | 0.15  | 1894002.38 | 156914.33 | 27.63 |  |
| 0.27  | 0.06  | 437014.69  | 89740.66  | 6.38  |  |
| 0.36  | 0.05  | 155703.45  | 41483.01  | 2.27  |  |
| 0.98  | 0.04  | 271918.50  | 95768.83  | 3.97  |  |
| 1.22  | 0.08  | 221813.67  | 37366.83  | 3.24  |  |
| 1.40  | 0.09  | 382647.88  | 53072.18  | 5.58  |  |
| 1.56  | 0.12  | 556172.44  | 55576.87  | 8.11  |  |
| 1.77  | 0.10  | 700590.00  | 86905.44  | 10.22 |  |
| 1.86  | 0.05  | 365538.19  | 89596.53  | 5.33  |  |
| 1.98  | 0.08  | 526599.06  | 92715.45  | 7.68  |  |
| 2.13  | 0.06  | 263161.16  | 54866.41  | 3.84  |  |
| 2.27  | 0.05  | 189155.39  | 51044.39  | 2.76  |  |
| 2.33  | 0.06  | 277677.00  | 58777.80  | 4.05  |  |
| 2.51  | 0.05  | 128105.84  | 43750.95  | 1.87  |  |
| 2.62  | 0.04  | 118888.68  | 45586.55  | 1.73  |  |
| 2.68  | 0.07  | 219188.27  | 40898.83  | 3.20  |  |
| 2.96  | 0.08  | 146532.42  | 24227.98  | 2.14  |  |



Ret. Time: 0.16

&lt;&lt;&lt;&lt; POSITIVE SPECTRA &gt;&gt;&gt;&gt;

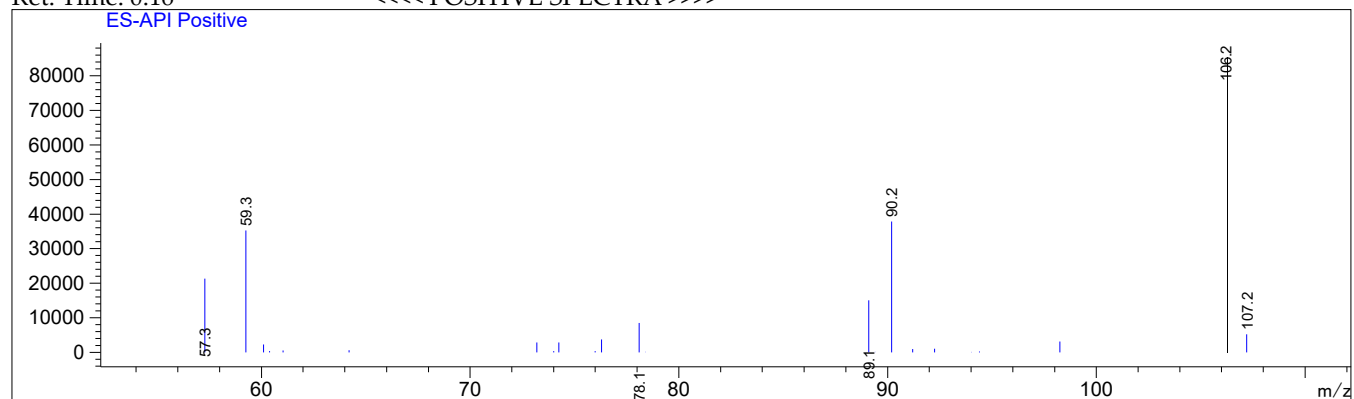

Ret. Time: 0.27

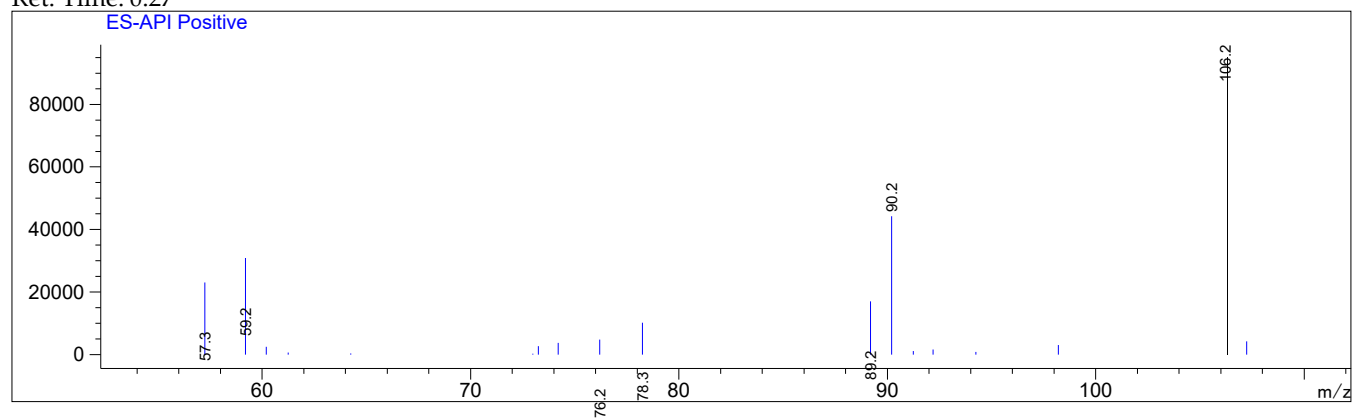

Ret. Time: 0.36

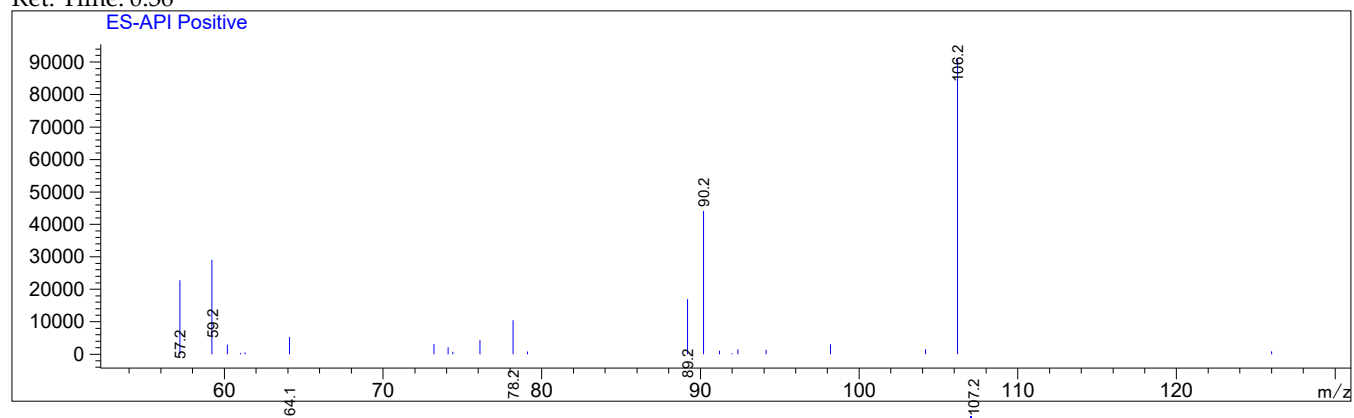

Ret. Time: 0.98

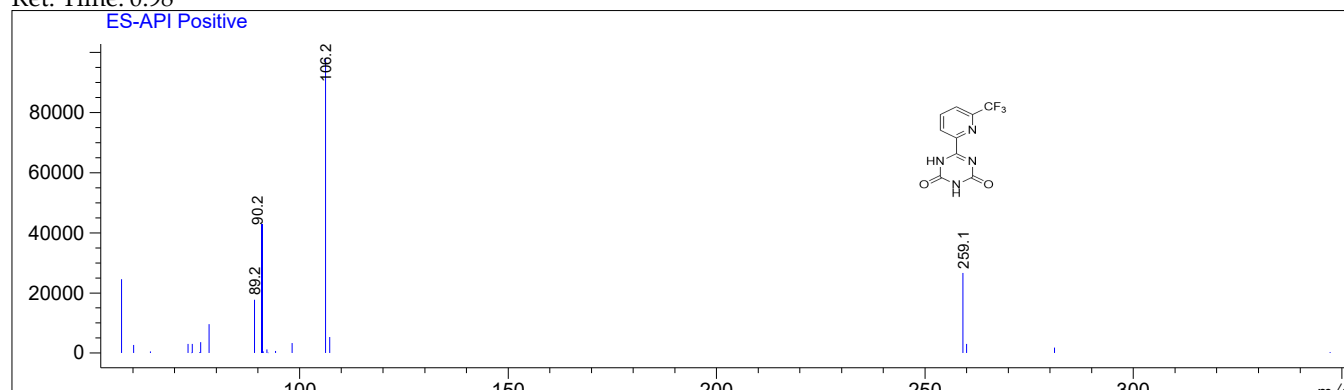



57.3

78.3

107.2

# MS Report

Ret. Time: 1.22

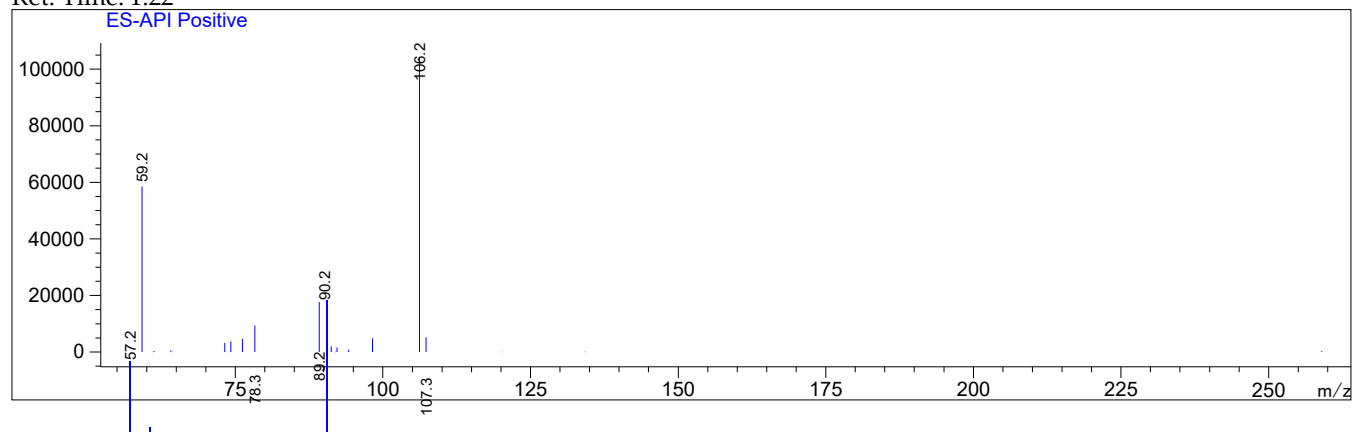

Ret. Time: 1.40

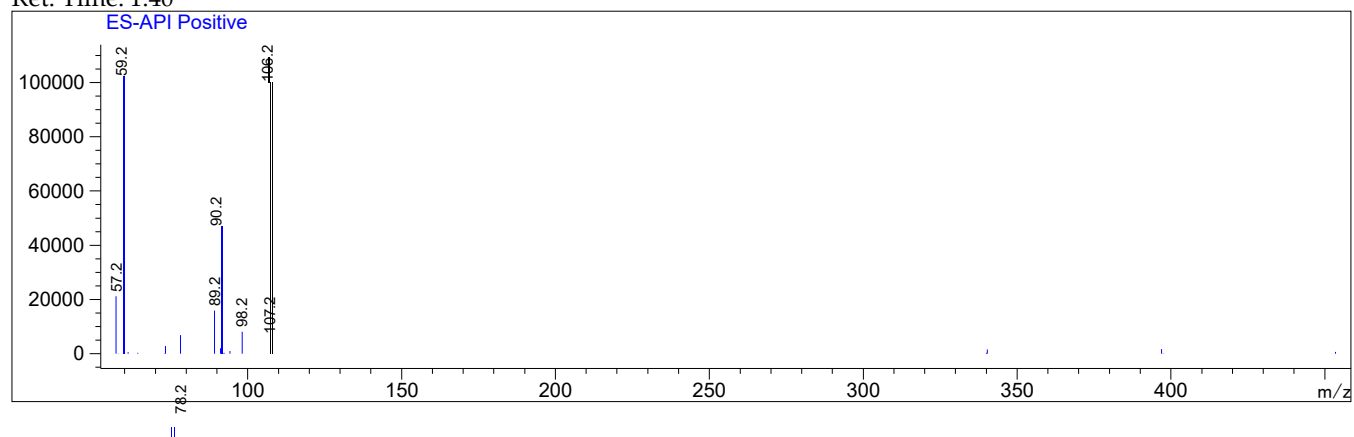

Ret. Time: 1.56

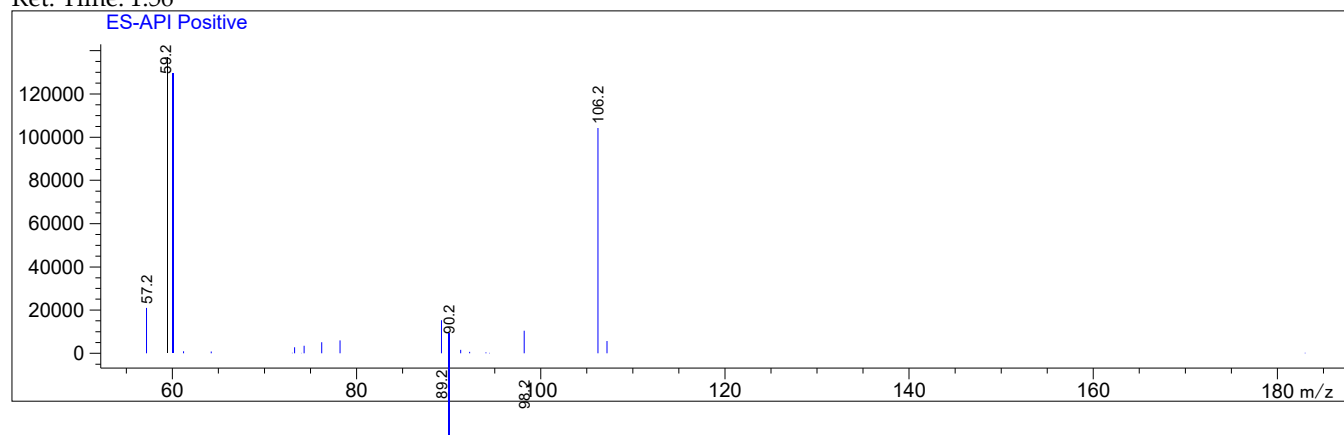

Ret. Time: 1.77

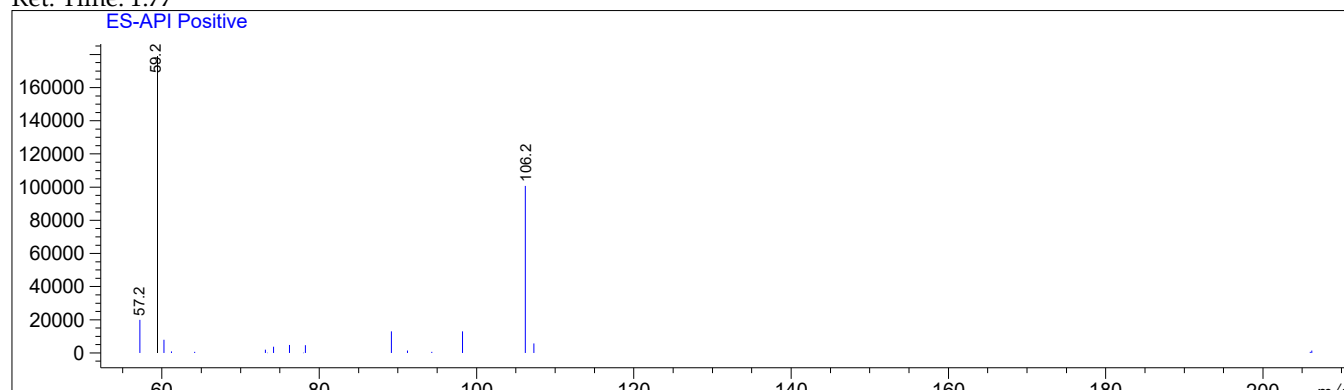

89.2 90.2

98.2

# MS Report

Ret. Time: 1.86

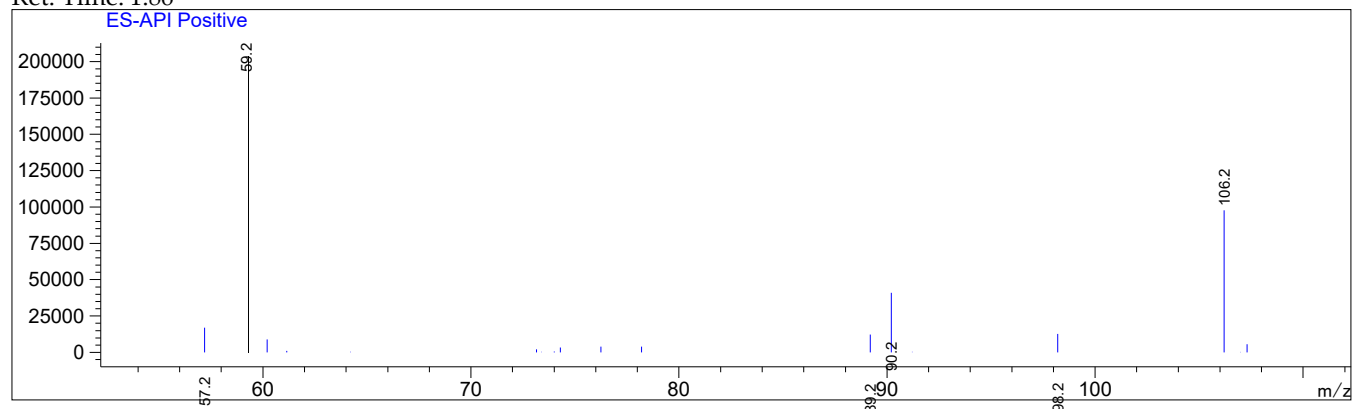

Ret. Time: 1.98

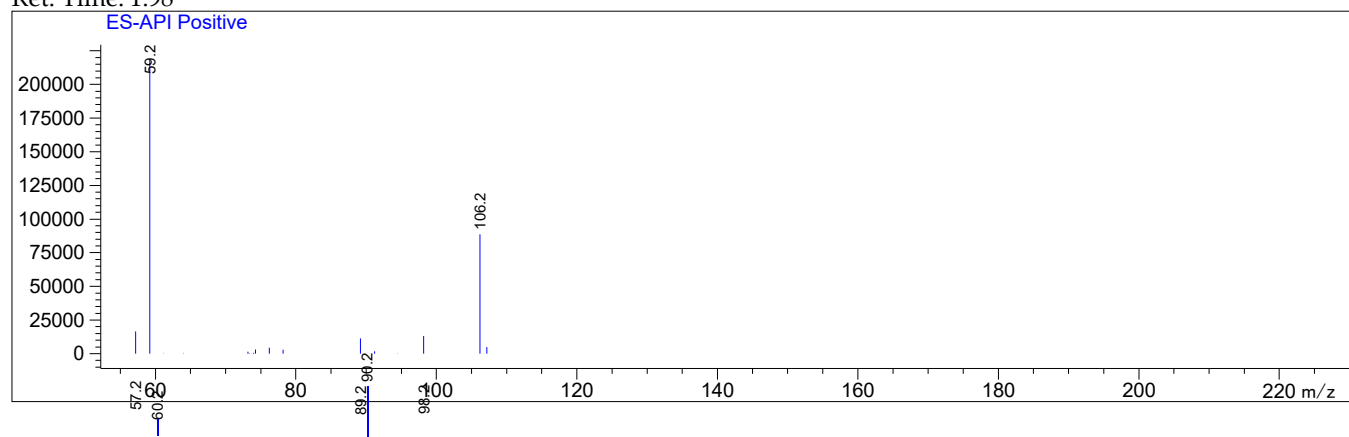

Ret. Time: 2.13

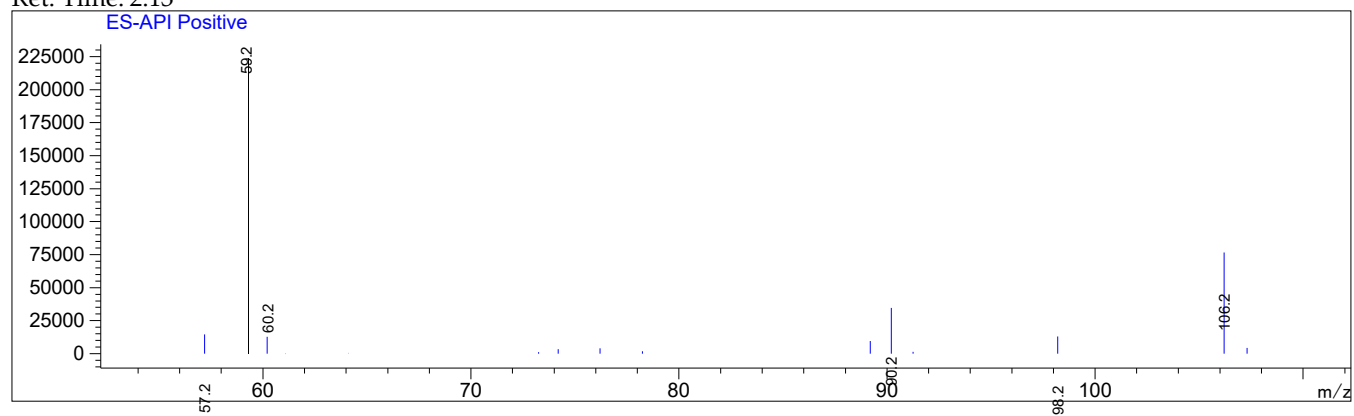

Ret. Time: 2.27

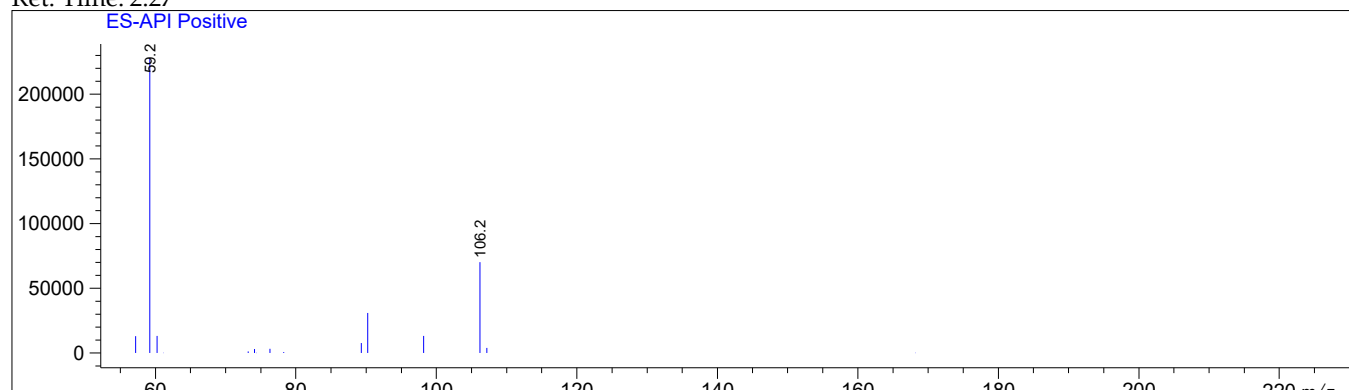

57.2  
60.3

90.2

98.2



# MS Report

Ret. Time: 2.33

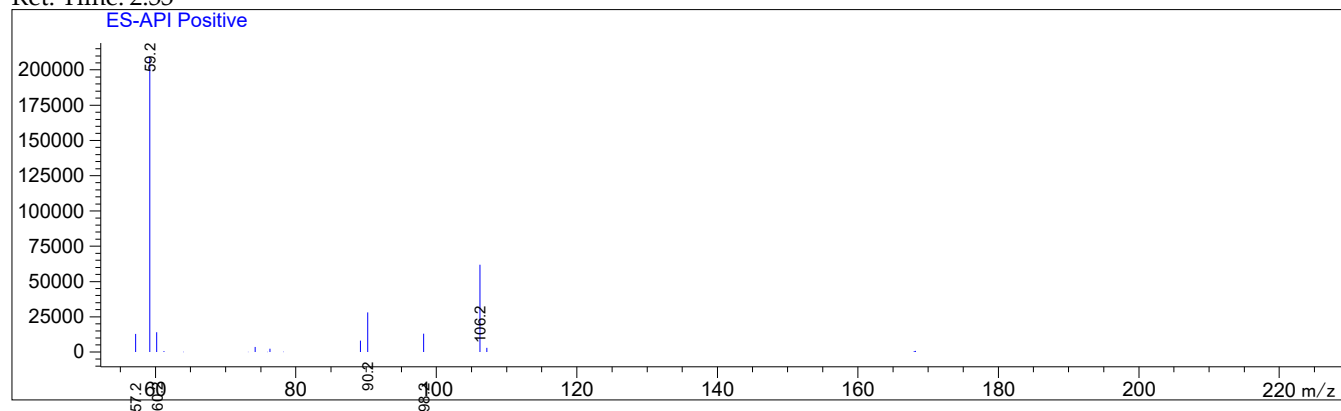

Ret. Time: 2.51

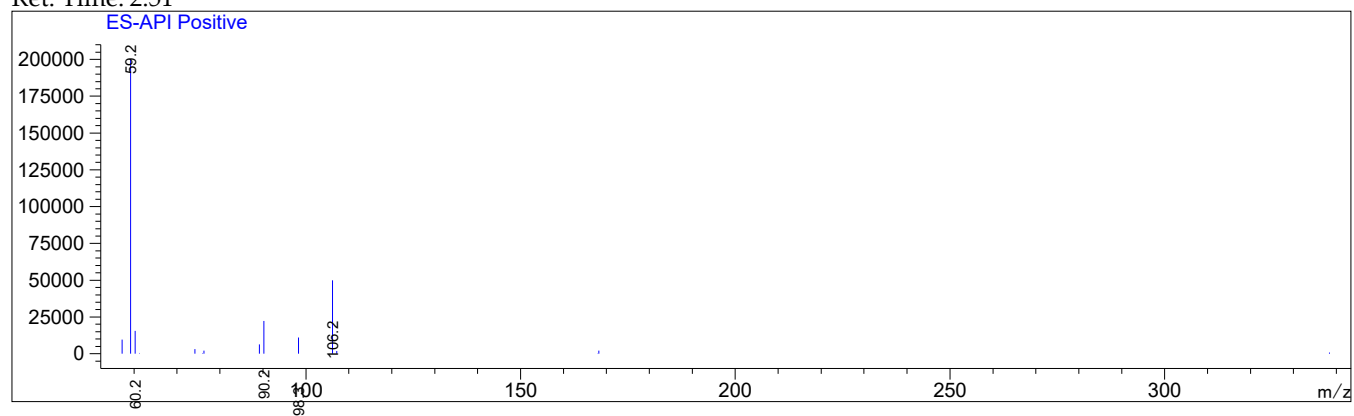

Ret. Time: 2.62

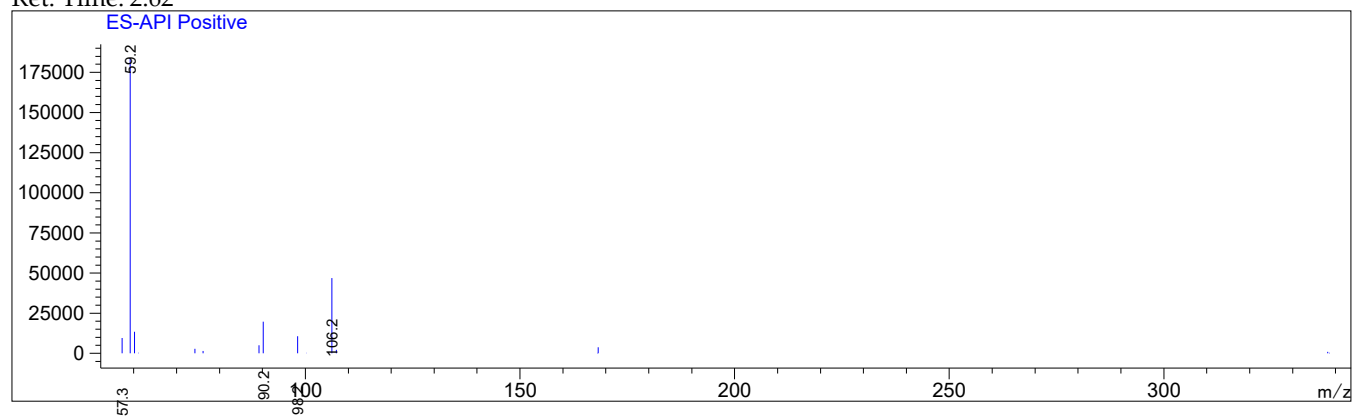

Ret. Time: 2.68

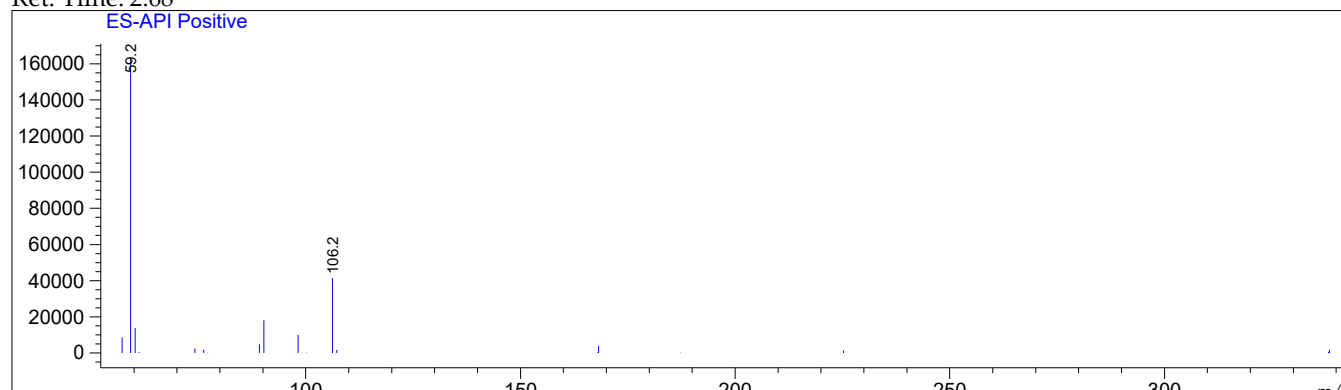

57.2

90.2

98.2

# MS Report

Ret. Time: 2.96

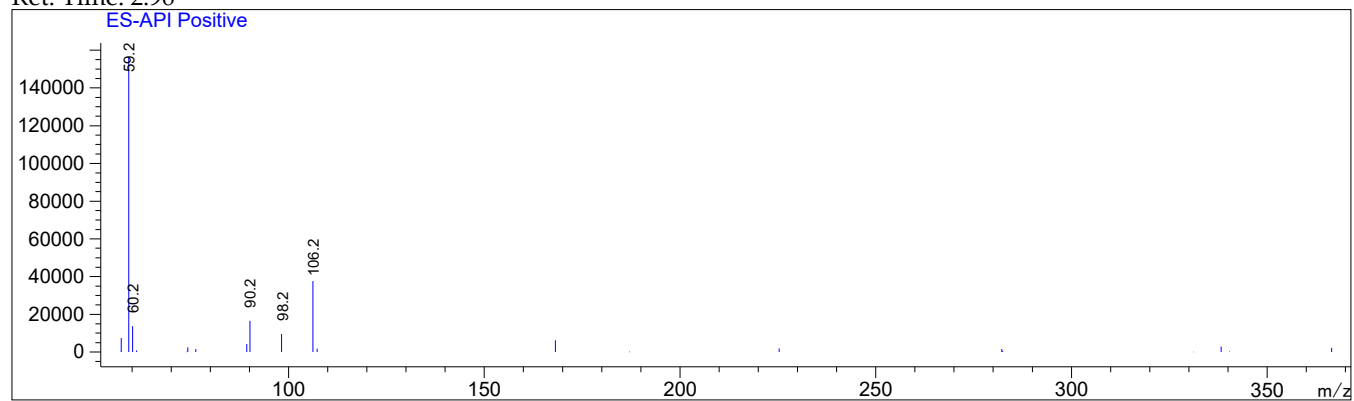



MS report 2: 2,4-dichloro-6-(6-(trifluoromethyl)pyridin-2-yl)-1,3,5-triazine

File ..09\MONITOR\SP-0027462-2P1-04381-LCMSA 046.D Tgt Mass (EZ): 294.00  
Injection Date : 25 Nov 21 11:06 am +0800 Seq. Line : 0  
Sample Name : SP-0027462-2P1 Location : P2-F-08  
Acq. Operator : 109monitor Inj : 1  
Spec. Reported : MS Integration Inj Volume : 0.5 ul  
Acq. Method : C:\Chem32\1\METHODS\MONITOR 2.75MIN-B-P  
Analysis Method : C:\Chem32\1\METHODS\MONITOR 2.75MIN-B-P.M  
Sample Info : Easy-Access Method: 'MONITOR 2.75MIN-B-P.M' 294.00  
Method Info : Column: Phenomenex Kinetex EVO C18, 50mm\*4.6 mm, 2.6 um  
Mobile Phase: A: Water (0.01mol/L NH4HCO3) B: ACN  
Gradient : 5-100% B (MeCN) in 1.75min, 100% at 2.55min, 5% at 2.65min, en  
Flow rate: 2.3 ml/min  
Column Temperature: 40 °C

DAD1 A, Sig=214,4 Ref=off

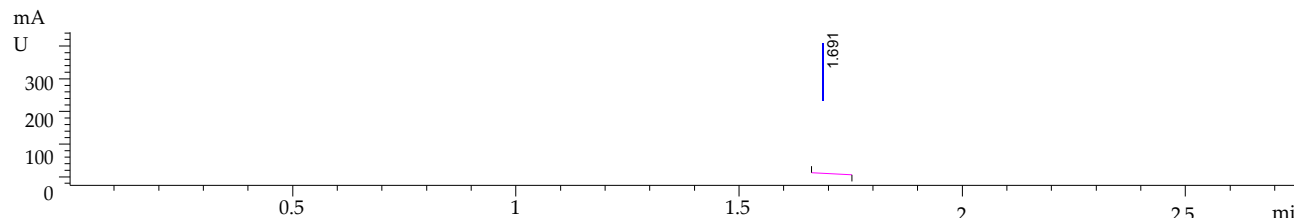

DAD1 B, Sig=254,4 Ref=off

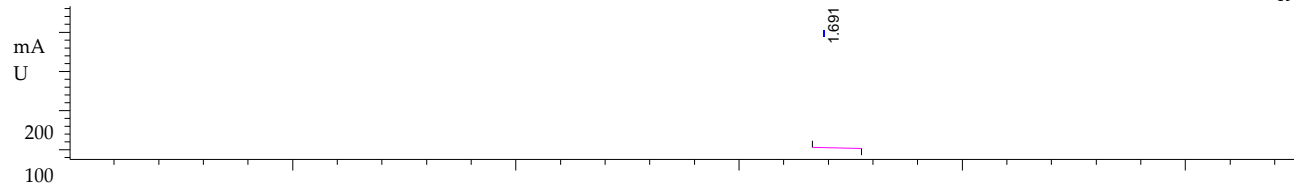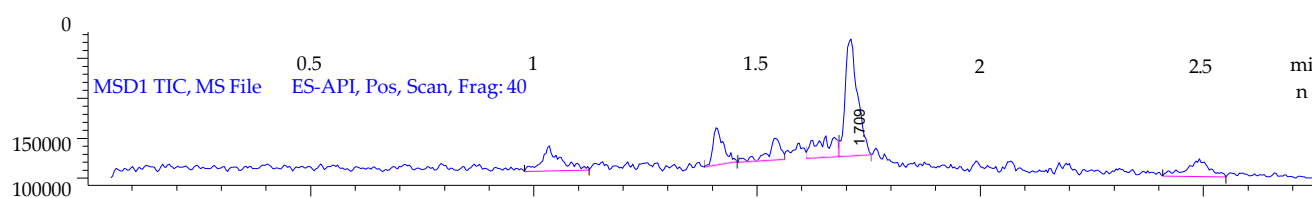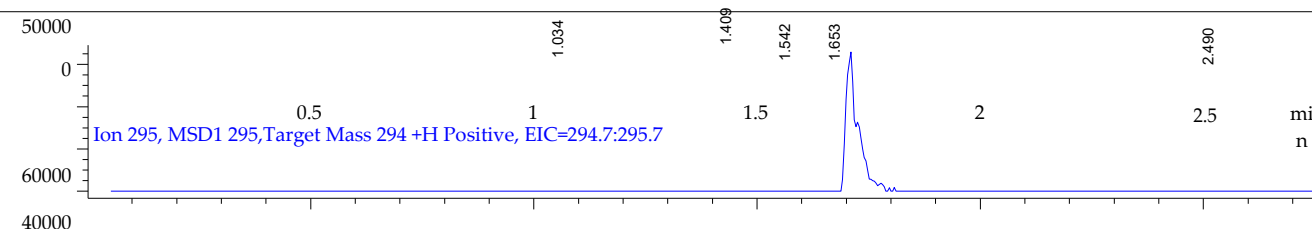

Integration Results for DAD1 A, Sig=214,4 Ref=off

| RetTim | Width | Area   | Height | Area%  |
|--------|-------|--------|--------|--------|
| 1.69   | 0.01  | 394.73 | 412.01 | 100.00 |

Integration Results for DAD1 B, Sig=254,4 Ref=off

| RetTim | Width | Area   | Height | Area%  |
|--------|-------|--------|--------|--------|
| 1.69   | 0.01  | 331.63 | 343.54 | 100.00 |

Integration Results for MSD1 TIC, MS File

| RetTim | Width | Area     | Height   | Area% |
|--------|-------|----------|----------|-------|
| 1.03   | 0.04  | 91138.29 | 31642.16 | 13.82 |
| 1.41   | 0.02  | 76221.73 | 47303.34 | 11.55 |
| 1.54   | 0.03  | 56649.94 | 26844.77 | 8.59  |



|      |      |           |           |       |
|------|------|-----------|-----------|-------|
| 1.65 | 0.04 | 79144.08  | 27141.74  | 12.00 |
| 1.71 | 0.03 | 281485.75 | 147665.81 | 42.67 |
| 2.49 | 0.04 | 75003.82  | 21971.37  | 11.37 |

Ret. Time: 1.03

&lt;&lt;&lt;&lt; POSITIVE SPECTRA &gt;&gt;&gt;&gt;

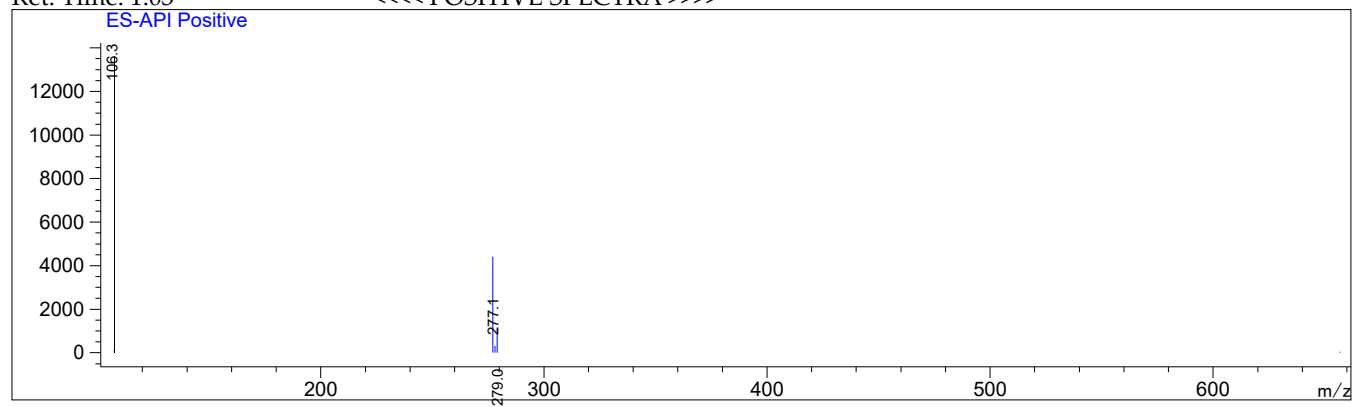

Ret. Time: 1.41

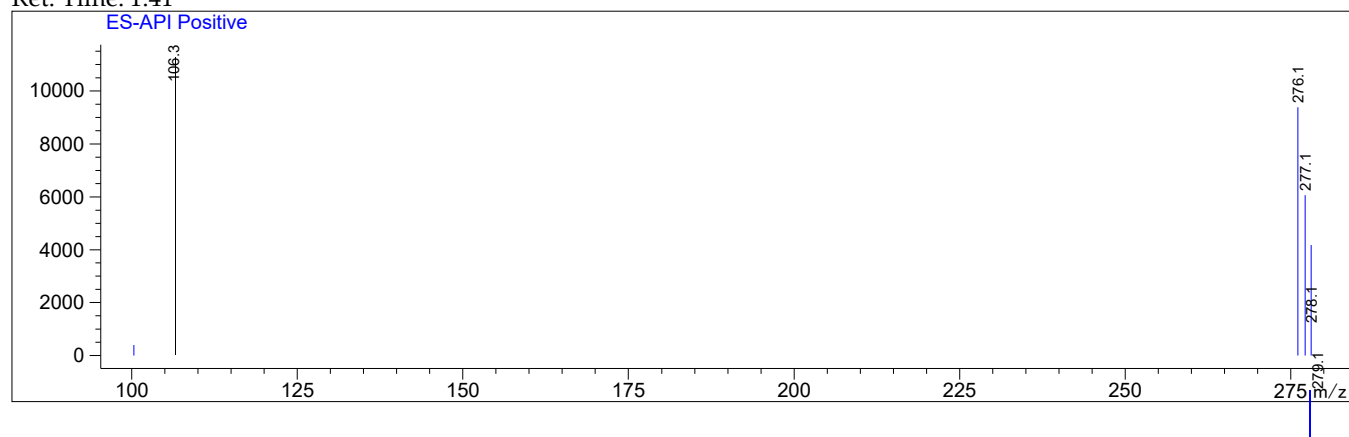

Ret. Time: 1.54

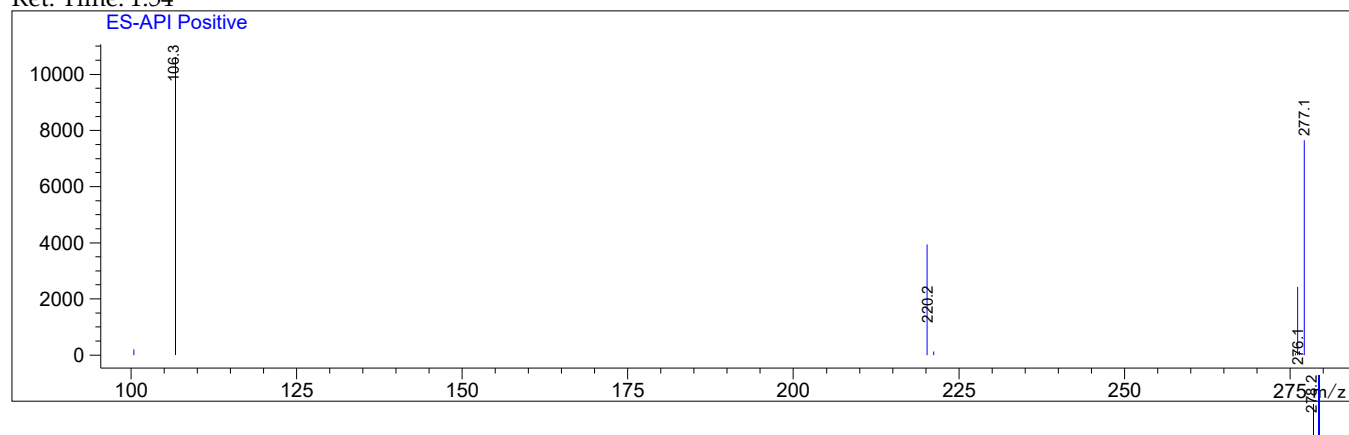

Ret. Time: 1.65

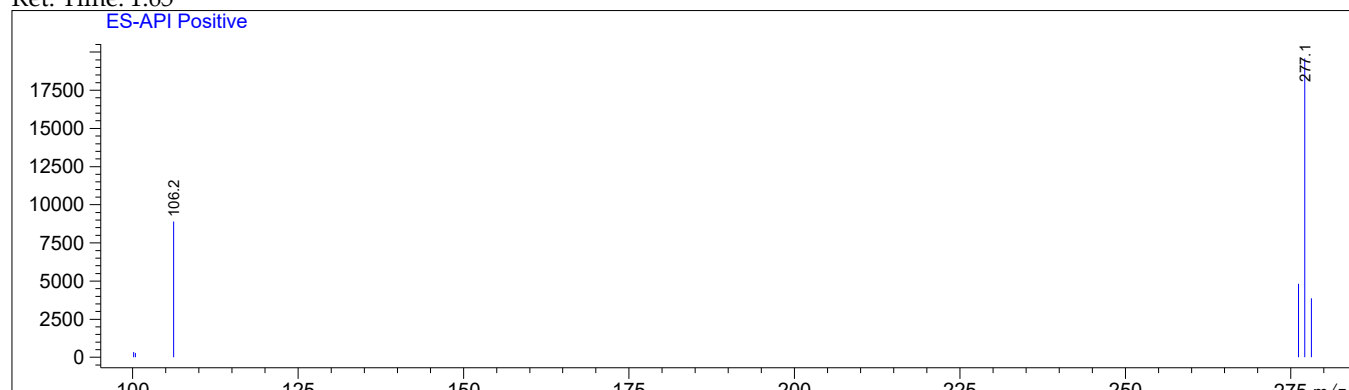

LCMSA 046 11/25/2021 11:09:25 AM 109monitor

Page 2 of 3

# MS Report

Ret. Time: 1.71

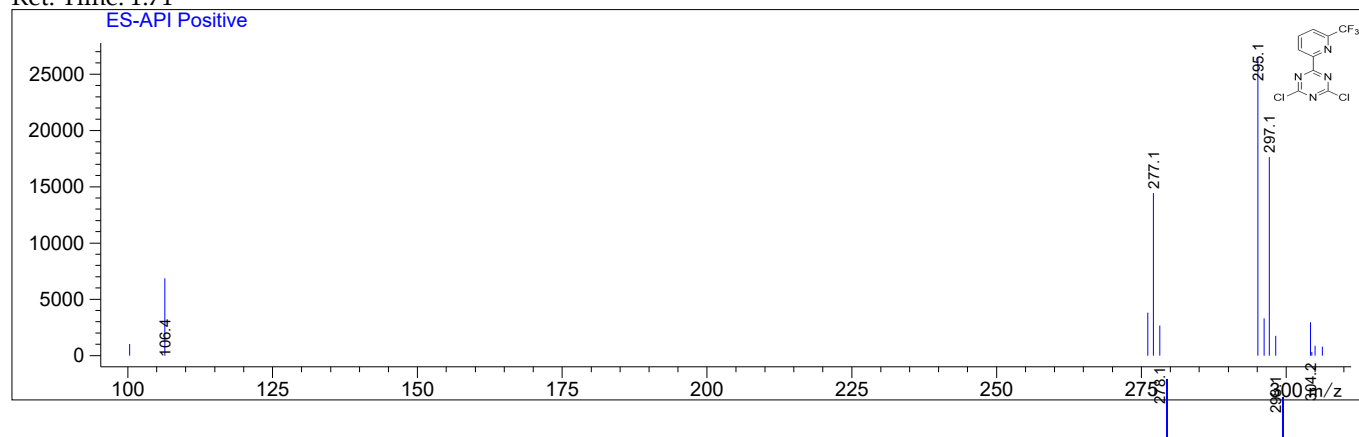

Ret. Time: 2.49

ES-API Positive <<< Below Cutoff >>>

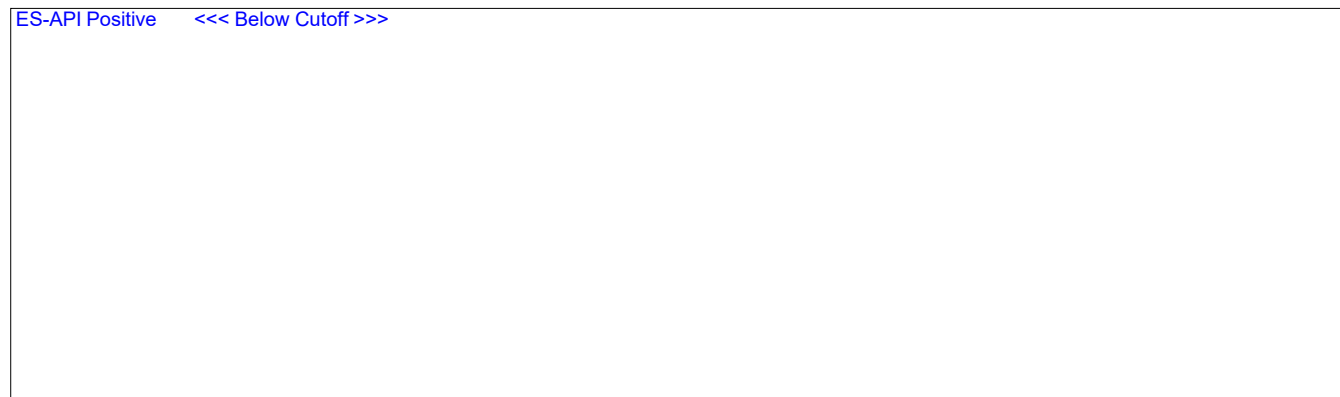



MS report 3: 1-((4-((3-fluoropyridin-4-yl)amino)-6-(6-(trifluoromethyl)pyridin-2-yl)-1,3,5- triazin-2-yl)amino)-2-methylpropan-2-ol

File .. T109\MONITOR\SP-002764-DP-1-03410-LCMS047.D Tgt Mass (EZX): 423.00  
Injection Date : 8 Dec 21 1:51 pm +0800 Seq. Line : 0  
Sample Name : SP-002764-DP-1 Location : P1-A-09  
Acq. Operator : 109monitor Inj : 1  
Spec. Reported : MS Integration Inj Volume : 3 ul  
Acq. Method : C:\Chem32\1\METHODS\MONITOR 3MIN-50-B-P  
Analysis Method : C:\CHEM32\1\METHODS\MONITOR 3MIN-B-P.M  
Sample Info : Easy-Access Method: 'MONITOR 3MIN-50-B-P.M' 423.00  
Method Info : Column: Waters X Bridge C18: 50mm\*4.6 mm\*3.5 um;  
Mobile Phase: A: Water (0.01mol/L NH4HCO3) B: ACN  
Gradient : B from 5% to 95% for 1.6 min and hold 95% for 1.4 min;  
Flow rate: 2.0 ml/min;  
Column Temperature: 40 °C

DAD1 A, Sig=254,4 Ref=off

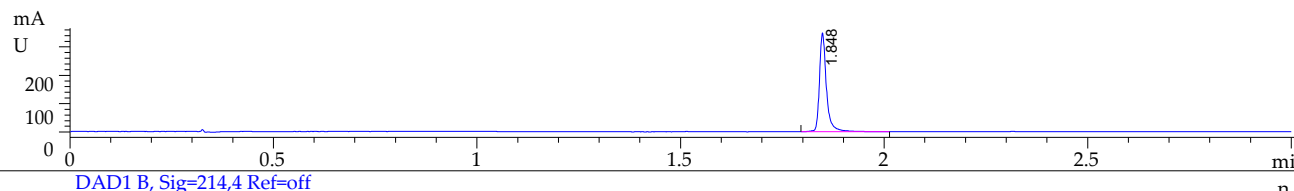

DAD1 B, Sig=214,4 Ref=off

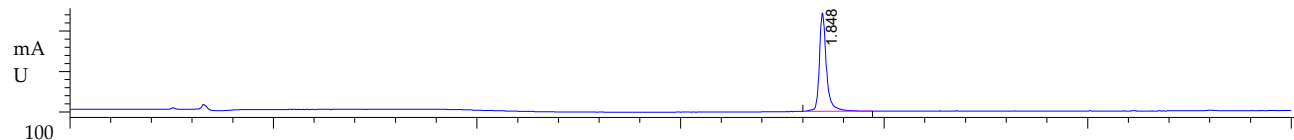

ELS1 A, Voltage

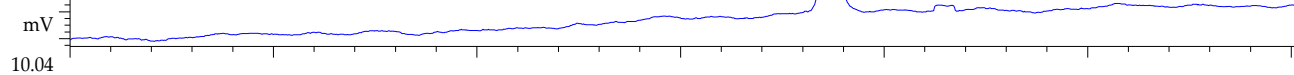

MSD1 TIC, MS File ES-API, Pos, Scan, Frag: 40

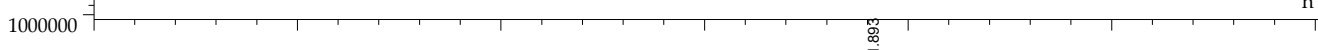

Ion 424, MSD1 424, Target Mass 423 +H Positive, EIC=423.7:424.7

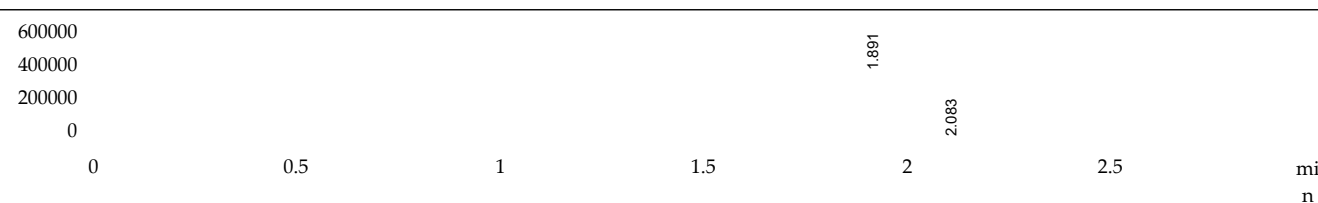

Integration Results for DAD1 A, Sig=254,4 Ref=off

| RetTim | Width | Area   | Height | Area%  |
|--------|-------|--------|--------|--------|
| 1.85   | 0.02  | 413.09 | 348.04 | 100.00 |

Integration Results for DAD1 B, Sig=214,4 Ref=off

| RetTim | Width | Area   | Height | Area%  |
|--------|-------|--------|--------|--------|
| 1.85   | 0.02  | 292.27 | 242.33 | 100.00 |

Integration Results for ELS1 A, Voltage

| RetTim | Width | Area | Height | Area% |
|--------|-------|------|--------|-------|
|        |       |      |        |       |

Integration Results for MSD1 TIC, MS File

| RetTime | Width | Area       | Height    | Area%  |
|---------|-------|------------|-----------|--------|
| 1.89    | 0.04  | 2232784.50 | 765318.81 | 100.00 |

Ret. Time: 1.89

&lt;&lt;&lt; POSITIVE SPECTRA &gt;&gt;&gt;

ES-API Positive

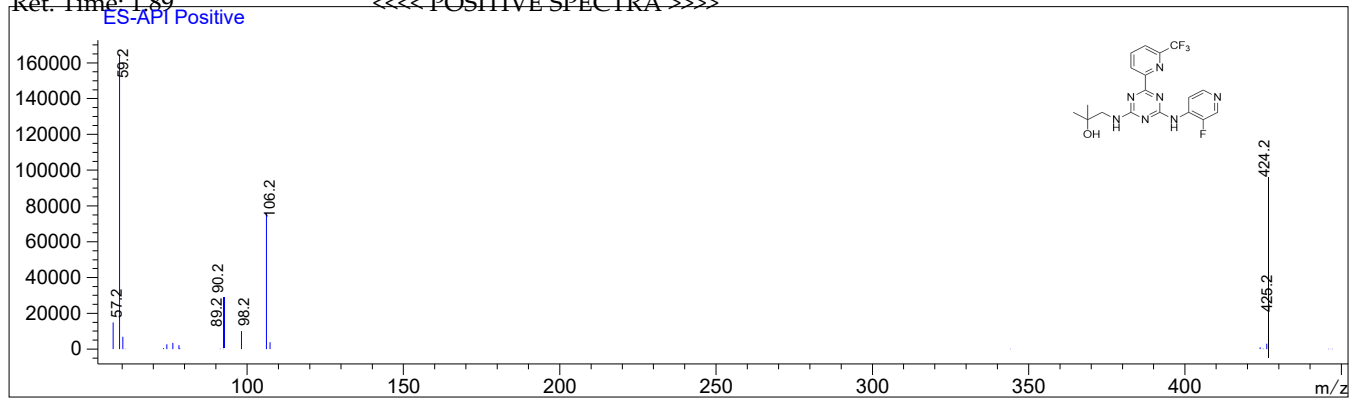

Supplement: s1 [file s1]
